# Supplementary material for: Transcriptional Profiling of Human Brain Endothelial Cells Reveals Key Properties Crucial for Predictive In Vitro Blood-Brain Barrier Models
Source: PLoS One. 2012 May 31;7(5):e38149. doi: 10.1371/journal.pone.0038149 (PMC3364980; doi:10.1371/journal.pone.0038149)
Supplement: Table S1 — All average expression data. (XLS) [file pone.0038149.s005.xls]

## Sheet: Sheet1
Probeset	GeneSymbole	GeneID	hpBECs	hpBECs + HA	hCMEC/D3	hCMEC/D3 + HA
1007_s_at	DDR1	780	8.11792	8.14725	8.72605	8.80452
1053_at	RFC2	5982	6.7648	6.7845	8.78622	8.8074
117_at	HSPA6	3310	4.23868	4.2174	4.16785	4.15952
121_at	PAX8	7849	7.21718	7.1451	6.70535	6.80207
1255_g_at	GUCA1A	2978	2.34145	2.57242	2.39637	2.42722
1294_at	UBA7	7318	7.39948	7.25575	8.40437	7.9065
1316_at	THRA	7067	5.64975	5.50195	5.64027	5.73008
1320_at	PTPN21	11099	4.9293	4.82207	4.5154	4.60455
1405_i_at	CCL5	6352	3.38848	3.56335	10.6574	9.49565
1431_at	CYP2E1	1571	2.99447	3.04212	3.01755	2.99835
1438_at	EPHB3	2049	4.4895	4.61658	4.3447	4.35532
1487_at	ESRRA	2101	7.31572	7.30875	6.84868	6.84525
1494_f_at	CYP2A6	1548	5.12937	5.23312	5.02368	4.96565
1552256_a_at	SCARB1	949	6.93585	6.93613	7.25822	7.45707
1552257_a_at	TTLL12	23170	8.18545	8.26615	8.23005	8.2686
1552258_at	NCRNA00152	112597	5.53233	5.37343	5.1234	5.23495
1552261_at	WFDC2	10406	3.17708	3.2545	2.9686	3.27145
1552263_at	MAPK1	5594	7.44135	7.37203	6.91038	6.9183
1552264_a_at	MAPK1	5594	8.03637	7.99575	7.57445	7.5792
1552266_at	ADAM32	203102	2.29283	2.25732	2.12902	2.2233
1552269_at	SPATA17	128153	2.6184	2.55572	2.5934	2.5601
1552271_at	PRR22	163154	4.8013	4.93912	4.72558	4.76473
1552272_a_at	PRR22	163154	4.64295	4.52377	4.84505	4.78028
1552274_at	PXK	54899	6.57175	6.48762	7.36308	7.2462
1552275_s_at	PXK	54899	5.6518	5.59525	6.6903	6.59392
1552276_a_at	VPS18	57617	4.9914	4.88662	4.51582	4.60065
1552277_a_at	C9orf30	91283	9.4157	9.34255	9.04467	8.9715
1552278_a_at	SLC46A1	113235	3.49288	3.5761	3.56175	3.52208
1552279_a_at	SLC46A1	113235	5.0013	4.9365	5.05577	4.93168
1552280_at	TIMD4	91937	3.24443	3.2182	3.16852	3.18947
1552281_at	SLC39A5	283375	5.63523	5.56998	5.51272	5.52782
1552283_s_at	ZDHHC11	79844	3.2289	3.22617	4.53225	4.6421
1552286_at	ATP6V1E2	90423	5.10475	4.81205	5.31155	5.3241
1552287_s_at	AFG3L1	172	7.41703	7.37387	8.0346	7.97992
1552288_at	CILP2	148113	2.7306	2.64675	2.81147	2.84607
1552289_a_at	CILP2	148113	2.9743	2.98115	2.7877	2.90865
1552291_at	PIGX	54965	5.84943	5.6576	6.7975	6.86595
1552293_at	TMEM196	256130	3.96807	3.95965	4.0333	3.89602
1552295_a_at	SLC39A13	91252	6.94362	6.81055	6.35938	6.42758
1552296_at	BEST4	266675	3.38647	3.32885	3.21932	3.31583
1552299_at	AKD1	221264	3.8879	4.16903	4.75475	4.4476
1552301_a_at	CORO6	84940	5.7576	5.65428	5.54913	5.30365
1552302_at	TMEM106A	113277	5.52603	5.31055	4.96413	4.72168
1552303_a_at	TMEM106A	113277	6.15845	6.0942	5.87587	5.6586
1552304_at	ALG10	84920	3.17598	3.1064	4.37065	4.05268
1552306_at	ALG10	84920	4.25392	4.12343	5.7243	5.6123
1552307_a_at	TTC39C	125488	4.28955	4.33312	3.45165	3.471
1552309_a_at	NEXN	91624	8.86252	8.80777	8.39542	8.24055
1552310_at	C15orf40	123207	7.64723	7.5107	7.7244	7.73097
1552311_a_at	RAX2	84839	6.2585	6.31295	6.0495	6.11897
1552312_a_at	MFAP3	4238	6.18355	6.35485	6.68122	6.80905
1552314_a_at	EYA3	2140	5.21975	5.289	5.11823	5.14423
1552315_at	GIMAP1	170575	7.67535	7.6106	6.12533	6.00288
1552316_a_at	GIMAP1	170575	8.74788	8.5292	6.60323	6.48567
1552318_at	GIMAP1	170575	8.499	8.30027	6.42478	6.1604
1552319_a_at	KLK8	11202	3.7125	3.7962	3.5975	3.63887
1552320_a_at	CCDC65	85478	2.41922	2.54895	2.29522	2.36945
1552321_a_at	CCDC65	85478	2.48575	2.35908	2.4515	2.4182
1552322_at	FAM122C	159091	2.33358	2.25735	3.28753	3.1329
1552323_s_at	FAM122C	159091	3.50155	3.23985	5.37467	5.21293
1552325_at	CCDC11	220136	2.03335	2.00827	2.19972	2.3027
1552326_a_at	CCDC11	220136	3.09567	3.1428	3.00685	3.05897
1552327_at	NA	NA	4.7102	4.62197	4.83362	4.62857
1552329_at	RBBP6	5930	6.1321	6.0352	5.81203	5.73482
1552330_at	CENPBD1	92806	6.31005	6.186	5.69683	5.7411
1552332_at	TRIOBP	11078	7.02757	7.02413	7.27358	7.2558
1552334_at	TRIOBP	11078	6.92415	6.68703	6.85037	6.629
1552335_at	CATSPER1	117144	6.24735	6.06717	6.0586	6.07578
1552337_s_at	HOXD4	3233	5.2599	5.04455	3.17898	3.59302
1552338_at	GSC	145258	3.6597	3.52703	3.46248	3.56355
1552340_at	SP7	121340	3.45558	3.57472	3.56042	3.54267
1552343_s_at	PDE7A	5150	3.92235	4.0097	4.1099	4.03777
1552344_s_at	CNOT7	29883	7.95685	7.96753	7.2121	7.3753
1552347_at	CRYZL1	9946	7.48975	7.3704	7.20253	7.17402
1552348_at	PRSS33	260429	3.9668	4.03735	3.75828	3.92747
1552349_a_at	PRSS33	260429	4.02257	3.90928	3.81797	3.78808
1552354_at	C19orf26	255057	3.85265	4.01145	3.83177	3.80622
1552355_s_at	C19orf26	255057	4.5938	4.54938	4.60058	4.51967
1552359_at	C8orf45	157777	2.3245	2.15088	2.30583	2.26175
1552360_a_at	TIRAP	114609	4.59718	4.66598	4.6932	4.48532
1552362_a_at	LEAP2	116842	4.2145	4.295	4.77695	4.81862
1552364_s_at	MSI2	124540	5.18393	5.35675	5.28298	5.3652
1552365_at	SCIN	85477	2.33963	2.34275	2.16133	2.21683
1552367_a_at	SCIN	85477	2.41085	2.428	2.33232	2.29455
1552368_at	CTCFL	140690	2.66265	2.54375	2.56253	2.67908
1552370_at	C4orf33	132321	5.28367	5.3022	6.90338	6.62223
1552372_at	C4orf33	132321	2.052	1.9697	2.02608	2.0324
1552373_s_at	C4orf33	132321	1.95663	1.94673	2.20205	2.0337
1552375_at	ZNF333	84449	4.21662	4.03105	3.92417	3.93055
1552377_s_at	FAM18B2	201158	6.32808	6.06635	5.83122	5.71157
1552378_s_at	RDH10	157506	5.1486	5.2031	5.35628	5.32242
1552379_at	RDH10	157506	2.03642	1.94495	2.01343	2.01938
1552381_at	SFRS13B	135295	2.69575	2.65183	2.65285	2.6015
1552383_at	FAM71A	149647	5.07212	5.14478	4.99938	4.79997
1552384_a_at	FAM71A	149647	3.75055	3.64493	3.77097	3.73937
1552386_at	GAPT	202309	2.28595	2.29758	2.31285	2.1314
1552388_at	FLJ30901	150378	5.57343	5.51135	5.1826	5.10288
1552389_at	C8orf47	203111	2.23675	2.55085	2.35505	2.3725
1552390_a_at	C8orf47	203111	2.2274	2.1613	2.369	2.29495
1552391_at	C1orf65	164127	3.57325	3.53465	3.43717	3.4375
1552393_at	ENTHD1	150350	2.42468	2.4865	2.3843	2.55985
1552394_a_at	ENTHD1	150350	2.39385	2.58468	2.56663	2.5987
1552395_at	TSSK3	81629	6.1403	6.22025	5.94805	5.8117
1552396_at	NA	NA	3.9354	3.86862	3.73135	3.93067
1552398_a_at	NA	NA	3.03277	3.10125	2.93502	3.027
1552399_a_at	BRF1	2972	3.19515	3.1956	2.9895	2.87128
1552400_a_at	C15orf27	123591	3.43758	3.4629	3.54827	3.49618
1552401_a_at	C21orf41	54073	2.65053	2.62728	2.53115	2.73165
1552402_at	CALML6	163688	3.46535	3.3997	3.50745	3.35562
1552405_at	NLRP5	126206	3.82985	3.93423	3.4744	3.661
1552408_at	ODF4	146852	2.72805	2.80132	2.83745	2.697
1552409_a_at	ODF4	146852	4.80395	4.90395	4.61237	4.78487
1552410_at	CLEC4F	165530	3.5144	3.4057	3.38167	3.46735
1552411_at	NA	NA	5.60807	5.4539	5.30617	5.37793
1552412_a_at	NA	NA	3.0994	3.06933	3.11992	3.04928
1552414_at	WFDC9	259240	2.8244	2.8171	2.57385	2.71978
1552415_a_at	WFDC9	259240	3.86915	3.84787	3.81717	3.77305
1552417_a_at	NEDD1	121441	5.478	5.45983	6.59515	6.5658
1552418_at	TTLL10	254173	3.9781	4.07482	3.85955	3.8777
1552419_s_at	TTLL10	254173	4.71403	4.51225	4.317	4.379
1552421_a_at	CALR3	125972	2.6696	2.69215	2.5814	2.52307
1552422_at	C10orf25	220979	5.00353	4.94672	4.64435	4.80255
1552423_at	ETV3	2117	4.88727	4.79648	4.53942	4.60115
1552424_at	KLHL10	317719	2.47923	2.51395	2.5834	2.57803
1552425_a_at	KLHL10	317719	2.94625	2.94555	2.8347	2.77192
1552426_a_at	TM2D3	80213	9.26295	9.20083	9.35185	9.34753
1552427_at	ZNF485	220992	2.68847	2.72975	3.02755	3.28822
1552430_at	WDR17	116966	2.05955	1.94245	2.00228	2.02913
1552432_at	MFSD6L	162387	4.66753	4.58455	4.61295	4.64898
1552436_a_at	CDH23	64072	5.0151	5.02113	4.88865	4.88257
1552438_a_at	ANKAR	150709	2.78143	2.59385	2.45935	2.48487
1552439_s_at	MEGF11	84465	2.26065	2.3122	2.21632	2.32445
1552440_at	GPR182	11318	3.21362	3.31258	3.32773	3.26365
1552445_a_at	ESX1	80712	2.97912	2.98923	3.0082	2.95467
1552448_a_at	C8orf12	83656	2.57465	2.55907	2.46053	2.48365
1552449_a_at	SCGB1C1	147199	2.9627	2.81907	2.71883	2.85912
1552450_a_at	DNAJC5G	285126	5.31365	5.24445	4.99962	5.07982
1552452_at	WDR88	126248	2.87835	2.88132	2.89645	2.94137
1552453_a_at	WDR88	126248	3.10797	3.07088	2.90988	3.04343
1552455_at	PRUNE2	158471	2.9027	2.9869	3.30893	3.31158
1552456_a_at	MBD3L2	125997	4.17098	4.0232	3.98022	4.00678
1552457_a_at	ADAMTSL1	92949	5.5407	5.55087	5.3902	5.221
1552458_at	MBD3L1	85509	2.70383	2.60433	2.50622	2.43115
1552459_a_at	MBD3L1	85509	3.70745	3.5781	3.66942	3.73137
1552461_at	FAM46D	169966	2.40928	2.31892	2.3624	2.33645
1552463_at	SERPINB11	89778	2.76103	2.73833	2.83188	2.7287
1552466_x_at	NCRNA00161	118421	2.27307	2.30288	2.25035	2.30448
1552467_at	DSCR10	259234	5.27327	5.30797	5.37148	5.36132
1552468_a_at	DSCR10	259234	4.8244	4.85423	4.45275	4.56527
1552470_a_at	ABHD11	83451	3.45643	3.42288	3.7492	3.84768
1552472_a_at	ACAP2	23527	5.09295	4.99057	5.92208	5.71382
1552473_at	GAMT	2593	6.67652	6.61608	6.3548	6.37237
1552474_a_at	GAMT	2593	7.04795	7.08613	6.34085	6.38065
1552476_s_at	PLCD3	113026	4.6579	4.56795	4.8393	4.86955
1552477_a_at	IRF6	3664	5.39138	4.77658	3.3513	3.12667
1552478_a_at	IRF6	3664	3.44337	3.18548	2.94993	2.98002
1552480_s_at	PTPRC	5788	1.93812	1.97015	1.98117	2.05095
1552481_s_at	MAN1A2	10905	3.99425	3.8971	3.2245	3.23345
1552482_at	RAPH1	65059	2.7773	2.71968	2.76855	2.72115
1552484_at	SMCR8	140775	4.96995	4.93293	4.9282	4.85862
1552485_at	LACTB	114294	8.23515	8.1074	8.34103	8.3347
1552486_s_at	LACTB	114294	8.06028	7.89173	8.69915	8.4518
1552487_a_at	BNC1	646	7.38528	7.39647	5.54942	5.47707
1552489_s_at	MPP4	58538	6.08592	6.15	4.4165	4.51335
1552490_at	LACE1	246269	3.3255	3.31878	3.3437	3.27538
1552491_at	IDI2	91734	3.77155	3.81082	3.8288	3.7656
1552493_s_at	CYP11B1	1584	3.86517	3.8251	3.69015	3.66118
1552494_at	TAF8	129685	4.07775	4.0133	3.753	3.91192
1552496_a_at	COBL	23242	2.96638	2.85675	2.8275	2.88755
1552497_a_at	SLAMF6	114836	3.6212	3.77637	3.3991	3.44943
1552498_at	ZSCAN20	7579	3.8239	3.78287	3.76865	3.68998
1552499_a_at	ZSCAN20	7579	3.89387	3.73925	3.77747	3.9435
1552501_a_at	GPBAR1	151306	4.6644	4.6482	4.4172	4.49402
1552502_s_at	RHBDL2	54933	2.68262	2.68495	4.2982	4.24257
1552503_at	FRAS1	80144	4.61682	4.5763	4.3905	4.6146
1552504_a_at	BRSK1	84446	3.9037	3.8234	3.72613	3.723
1552506_at	CRB2	286204	3.1648	3.19722	3.07627	3.06093
1552507_at	KCNE4	23704	2.86607	3.11825	2.84823	2.96663
1552508_at	KCNE4	23704	3.16742	3.22635	3.23847	3.37587
1552509_a_at	CD300LG	146894	2.57955	2.66883	2.6333	2.7189
1552510_at	SLC34A3	142680	7.37875	7.3252	7.34137	7.3649
1552511_a_at	CPA6	57094	2.13345	2.01727	2.0155	2.0756
1552514_at	WBP2NL	164684	2.45535	2.47505	2.55782	2.54292
1552515_at	HIPK1	204851	3.04277	3.16257	2.95448	2.81307
1552516_a_at	HIPK1	204851	3.47772	3.33765	3.4638	3.28462
1552518_s_at	MTBP	27085	3.1082	2.87053	5.05162	5.27313
1552519_at	ACVR1C	130399	3.45105	3.52218	3.42092	3.43992
1552520_at	TMEM74	157753	2.74265	2.81453	2.84045	2.84072
1552521_a_at	TMEM74	157753	2.22017	2.07952	2.02807	2.05788
1552522_at	TIGD4	201798	2.02632	2.17495	2.02398	2.01295
1552523_a_at	TIGD4	201798	3.49302	3.5606	3.57743	3.57788
1552524_at	ART5	116969	5.67998	5.4927	5.65878	5.75057
1552526_at	FAM71C	196472	3.53048	3.61315	3.64807	3.52142
1552528_at	C21orf67	84536	6.24605	6.26045	6.1677	6.08575
1552531_a_at	NLRP11	204801	2.8017	2.86285	2.85193	2.98493
1552532_a_at	ATP6V1C2	245973	2.45003	2.3451	2.47175	2.3398
1552535_at	CLDN19	149461	4.65113	4.51802	4.86477	4.72038
1552536_at	VTI1A	143187	3.2332	3.09455	3.02737	3.18728
1552538_a_at	KIF6	221458	2.17555	2.36897	2.5616	2.3468
1552540_s_at	IQCD	115811	4.85825	4.80987	4.90265	4.88352
1552541_at	TAGAP	117289	6.6113	6.60237	6.09672	6.1027
1552542_s_at	TAGAP	117289	3.1842	3.07347	3.04902	3.2161
1552543_a_at	STON2	85439	3.04855	2.9197	2.96135	2.89332
1552544_at	SERPINA12	145264	3.28958	3.3368	3.2031	3.29247
1552546_a_at	LETM2	137994	3.97008	3.7993	6.31628	6.17647
1552548_at	BSND	7809	3.0959	3.10347	2.90623	2.9406
1552549_a_at	BSND	7809	4.39898	4.5466	4.4192	4.52285
1552552_s_at	CLEC4C	170482	2.63255	2.7836	2.8099	2.69703
1552553_a_at	NLRC4	58484	2.6166	2.61993	2.5912	2.49883
1552554_a_at	NLRC4	58484	3.03852	3.22117	3.09695	2.98857
1552555_at	PRSS36	146547	4.55328	4.50655	4.54763	4.5723
1552557_a_at	ZDHHC15	158866	2.12927	2.05127	2.32383	2.3785
1552558_a_at	RAI1	10743	5.14602	5.07723	4.97015	5.04028
1552559_a_at	CDK15	65061	3.36298	3.29033	3.13028	3.16067
1552562_at	ZNF570	148268	4.03342	3.80453	4.0516	4.18775
1552563_a_at	NA	NA	2.35255	2.48208	2.5207	2.5833
1552564_at	NUDT9P1	119369	2.85317	2.76265	3.2572	3.28752
1552566_at	BTBD16	118663	3.10467	3.20695	3.32248	3.47148
1552568_at	RTP3	83597	4.02497	3.94322	3.7581	3.94057
1552569_a_at	RTP3	83597	3.8786	4.0709	3.89627	3.82222
1552570_at	C21orf29	54084	3.79133	3.7288	3.7782	3.7501
1552572_a_at	MIPOL1	145282	4.15505	4.20742	2.9896	2.95005
1552573_s_at	MIPOL1	145282	5.83758	5.8399	4.65923	4.76285
1552575_a_at	C6orf141	135398	7.1114	6.91868	5.7908	5.3255
1552576_at	ALMS1P	200420	3.545	3.49378	3.54497	3.44055
1552578_a_at	MYO3B	140469	2.3539	2.43962	2.29058	2.31862
1552579_a_at	ADAM21	8747	3.6558	3.64545	3.4943	3.76235
1552580_at	TRIML2	205860	3.53613	3.80153	3.74945	3.79197
1552582_at	ABCC13	150000	2.3982	2.2855	2.28633	2.3303
1552583_s_at	ABCC13	150000	2.8647	2.79995	2.6918	2.79095
1552584_at	IL12RB1	3594	3.43288	3.23135	4.4006	4.12373
1552585_s_at	GTF2A1L	11036	2.4928	2.50615	2.5024	2.4909
1552586_at	TRPV3	162514	3.90985	4.05847	4.0486	3.8816
1552587_at	CNBD1	168975	2.563	2.42338	2.4324	2.60902
1552588_a_at	CNBD1	168975	2.3836	2.37288	2.40025	2.48462
1552590_a_at	ABCC12	94160	2.29978	2.36592	2.26917	2.323
1552592_at	MMP21	118856	2.58847	2.51765	2.4445	2.43745
1552594_at	TMEM190	147744	4.9727	4.9149	4.84137	4.8785
1552596_at	GAS2L2	246176	5.54425	5.52885	5.3171	5.35765
1552598_at	KCNG4	93107	3.87298	3.95047	3.77007	3.98367
1552599_at	PXT1	222659	2.77	2.82555	2.73202	2.82415
1552602_at	CACNG5	27091	5.12585	5.12685	4.9154	4.98517
1552604_at	C21orf74	54143	4.33585	4.33287	4.21985	4.07975
1552605_s_at	C21orf74	54143	2.8479	3.00857	2.90008	2.87252
1552607_at	NCRNA00204	100132967	4.32715	4.12737	4.36225	4.50067
1552608_at	WFDC11	259239	2.9672	3.04478	2.9596	2.97763
1552609_s_at	NA	NA	3.17488	3.13082	3.09912	2.93737
1552610_a_at	JAK1	3716	9.17158	9.13625	8.42858	8.20308
1552611_a_at	JAK1	3716	10.3643	10.1608	9.68628	9.54237
1552612_at	CDC42SE2	56990	6.2101	6.1741	6.29675	6.12415
1552613_s_at	CDC42SE2	56990	6.10683	6.04905	6.36205	6.20793
1552615_at	ACACB	32	6.77718	6.82203	6.49273	6.5699
1552616_a_at	ACACB	32	4.2495	4.3565	4.22835	4.33145
1552617_a_at	RFWD2	64326	7.93678	8.08488	7.88272	7.84427
1552618_at	STX6	10228	7.6006	7.7369	7.58593	7.47873
1552619_a_at	ANLN	54443	7.67708	7.71258	9.63753	9.60185
1552620_at	SPRR4	163778	6.53655	6.49165	6.29737	6.34795
1552621_at	NA	NA	8.45003	8.17933	7.90102	7.83745
1552622_s_at	NA	NA	7.53843	7.30045	7.1104	6.9986
1552623_at	HSH2D	84941	2.87872	3.0817	3.84815	3.43535
1552625_a_at	TRNT1	51095	6.48283	6.53947	6.85077	6.727
1552626_a_at	TMEM163	81615	6.81898	6.54335	3.90827	3.80665
1552627_a_at	ARHGAP5	394	5.5024	5.45267	5.9038	5.88735
1552628_a_at	HERPUD2	64224	8.56265	8.55748	8.26882	8.25005
1552629_a_at	JMJD6	23210	2.9474	2.84665	2.9294	3.00025
1552630_a_at	SRCAP	10847	4.63535	4.8137	4.7556	4.89447
1552631_a_at	MAP3K6	9064	4.44845	4.8512	4.90793	4.97035
1552632_a_at	ARSG	22901	4.47245	4.3393	4.1933	4.22235
1552633_at	ZNF101	94039	5.4814	5.3017	5.95843	5.98635
1552634_a_at	ZNF101	94039	5.21798	5.03137	5.77283	5.9849
1552637_at	PTPN11	5781	3.72443	3.64675	3.38935	3.48178
1552639_at	KLHDC7B	113730	4.2904	4.50955	4.17547	4.08075
1552641_s_at	NA	NA	6.2669	6.22903	6.61712	6.5939
1552643_at	ZNF626	199777	5.10315	5.12405	5.0897	5.05927
1552644_a_at	PHC3	80012	5.5047	5.1718	6.51307	6.4445
1552646_at	IL11RA	3590	4.6286	4.646	4.73227	4.8291
1552648_a_at	TNFRSF10A	8797	6.8342	6.71087	7.58645	7.32445
1552649_a_at	RFFL	117584	4.05408	3.98765	4.11013	4.12625
1552651_a_at	RFFL	117584	4.4068	4.49067	4.42415	4.394
1552652_at	HPS4	89781	5.84605	5.8836	5.95	5.94075
1552656_s_at	UHMK1	127933	4.19705	4.1858	4.17615	4.29553
1552657_a_at	TXNDC2	84203	4.45268	4.46762	4.24198	4.1803
1552658_a_at	NAV3	89795	5.38968	5.7216	3.2037	3.3888
1552660_a_at	C5orf22	55322	5.34952	5.16207	5.33975	5.20753
1552661_at	PCDHGB7	56099	2.1576	2.22305	2.23035	2.12012
1552662_a_at	PCDHGB7	56099	4.57812	4.6563	4.26702	4.33983
1552663_a_at	ERC1	23085	5.8637	5.7383	5.91322	5.97652
1552664_at	FLCN	201163	7.84053	7.5371	7.5079	7.3068
1552665_at	LOC84989	84989	5.63095	5.321	5.60127	5.71525
1552666_a_at	LRRC7	57554	2.30492	2.31433	2.12905	2.1426
1552667_a_at	SH2D3C	10044	7.23063	7.22568	6.55413	6.49538
1552669_at	PPP1R3B	79660	2.8188	2.93093	2.95188	2.77487
1552670_a_at	PPP1R3B	79660	6.02665	6.47335	5.47065	5.71897
1552671_a_at	SLC9A7	84679	4.71655	4.9642	4.9927	4.9024
1552672_a_at	IGSF3	3321	3.71205	3.5943	3.62387	3.57397
1552673_at	RFX6	222546	2.6158	2.57955	2.52505	2.66447
1552674_at	DIRC1	116093	2.0513	2.04568	2.08665	2.00122
1552675_at	DNAJB7	150353	2.0968	2.19992	2.10625	2.06853
1552676_at	UCN3	114131	4.6776	4.69195	4.31927	4.25422
1552677_a_at	DIP2A	23181	5.94405	5.8138	6.20792	6.1181
1552678_a_at	USP28	57646	5.45182	5.69275	6.25625	6.20363
1552680_a_at	CASC5	57082	6.17302	6.14927	8.30893	8.40982
1552682_a_at	CASC5	57082	3.71005	3.9188	5.40383	5.28202
1552684_a_at	SENP8	123228	4.58443	4.62403	4.35783	4.4169
1552685_a_at	GRHL1	29841	3.79467	3.72515	4.27205	4.21
1552686_at	C20orf152	140894	3.56022	3.6169	3.40943	3.4494
1552687_a_at	C20orf152	140894	3.25665	3.2043	3.3246	3.3696
1552689_at	CASKIN1	57524	6.29018	6.3805	6.04878	6.11777
1552690_a_at	CACNA2D4	93589	3.81993	3.90057	3.66668	3.71835
1552691_at	ARL11	115761	2.00555	2.20863	2.01017	2.04798
1552693_at	ARL11	115761	2.28615	2.37433	2.3084	2.33625
1552694_at	SLC2A13	114134	2.2939	2.25885	2.30245	2.1557
1552695_a_at	SLC2A13	114134	3.02677	2.98277	2.81032	2.75833
1552696_at	NIPA1	123606	3.7237	3.76662	4.27695	4.30582
1552698_at	MGC16703	113691	4.98398	4.90298	5.15007	5.11278
1552701_a_at	CARD16	114769	11.2482	10.9826	10.6139	10.4758
1552703_s_at	NA	NA	10.2686	10.0337	10.1788	9.92165
1552705_at	DUSP19	142679	3.1489	3.15928	3.3354	3.46347
1552708_a_at	DUSP19	142679	3.19112	3.12427	3.30118	3.12965
1552711_a_at	CYB5D1	124637	6.41903	6.5647	6.02565	6.22133
1552712_a_at	NMNAT2	23057	4.14307	4.0504	4.34788	4.12945
1552713_a_at	SLC4A1	6521	2.92148	3.05755	2.8112	2.9023
1552714_at	CREG2	200407	2.65345	2.66105	2.5415	2.64125
1552715_a_at	RXFP1	59350	2.28422	2.2413	2.57032	2.33665
1552716_at	SPEF2	79925	3.73077	3.6282	3.00775	2.94303
1552717_s_at	NA	NA	5.5471	5.59373	5.2404	4.9166
1552718_at	DTD1	92675	4.40842	4.39257	4.21162	4.1134
1552719_at	CASC4	113201	4.85747	4.97408	4.8975	5.11158
1552721_a_at	FGF1	2246	2.44552	2.43382	2.49702	2.59208
1552722_at	ARPP-21	10777	2.36238	2.4153	2.40455	2.40655
1552724_at	RHOXF1	158800	4.08425	4.24423	4.14757	4.14415
1552725_s_at	ADAMTS17	170691	3.60503	3.8057	3.43297	3.3979
1552726_at	ADAMTS17	170691	3.54517	3.52687	3.63607	3.63515
1552727_s_at	ADAMTS17	170691	2.50035	2.59638	2.56743	2.54592
1552729_at	SNHG7	84973	5.95582	6.03092	5.96995	6.06085
1552730_at	DHH	50846	5.13915	5.28105	5.00555	5.2238
1552731_at	ABRA	137735	2.42433	2.51878	2.57428	2.3677
1552732_at	ABRA	137735	1.92373	2.07295	2.02407	1.97835
1552733_at	KLHDC1	122773	5.3362	5.14678	4.45047	4.36715
1552734_at	RICTOR	253260	3.47278	3.449	4.08695	3.96317
1552735_at	NA	NA	4.4919	4.63485	3.29963	3.15682
1552736_a_at	NETO1	81832	2.51845	2.47233	2.4214	2.37122
1552737_s_at	WWP2	11060	3.13612	3.16918	3.32797	3.4802
1552738_a_at	ST7L	54879	5.38575	5.28295	5.40985	5.41568
1552739_s_at	ST7L	54879	5.53598	5.6987	6.00812	5.85908
1552740_at	C2orf15	150590	2.28057	2.33195	2.31632	2.34205
1552742_at	KCNH8	131096	2.14665	2.08498	2.11292	2.26302
1552743_at	MCF2L	23263	3.1726	3.28465	3.10035	3.24162
1552745_at	SLCO6A1	133482	2.83105	2.76128	2.77608	2.76495
1552747_a_at	C3orf48	151649	2.18875	2.16792	2.14507	2.1558
1552749_a_at	KLC3	147700	6.62233	6.57733	6.40358	6.344
1552750_at	CIB3	117286	2.67925	2.71395	2.63495	2.62093
1552751_a_at	CIB3	117286	5.22372	5.10705	4.90888	4.92793
1552752_a_at	CADM2	253559	3.05167	2.8865	2.84405	2.9016
1552754_a_at	CADM2	253559	2.64942	2.43752	2.15025	2.26985
1552755_at	C9orf66	157983	2.80143	2.92568	2.4907	2.51748
1552757_s_at	C9orf66	157983	2.8044	2.8873	2.67795	2.7279
1552758_at	HDAC9	9734	2.42745	2.41458	2.37338	2.43553
1552760_at	HDAC9	9734	2.76023	2.5421	2.68455	2.37588
1552761_at	SLC16A11	162515	5.8067	5.87195	5.68023	5.7192
1552763_at	TMEM67	91147	2.26313	2.32052	2.18987	2.29608
1552765_x_at	TMEM67	91147	2.453	2.61892	2.7291	2.5829
1552766_at	HS6ST2	90161	2.49705	2.54115	2.21305	2.32615
1552767_a_at	HS6ST2	90161	5.50858	5.36478	3.1023	3.15987
1552768_at	CAMKK1	84254	5.19532	5.12308	5.11813	5.12012
1552769_at	ZNF625	90589	4.53287	4.4866	4.51915	4.37148
1552770_s_at	ZNF563	147837	3.27902	3.17565	3.2403	3.1932
1552771_a_at	LIN9	286826	2.85265	2.77727	3.02745	3.1331
1552772_at	CLEC4D	338339	3.33755	3.3007	3.2961	3.3366
1552773_at	CLEC4D	338339	3.1398	3.08978	3.20323	3.31925
1552774_a_at	SLC25A27	9481	3.08365	2.99198	2.9631	2.95948
1552775_at	GPRC6A	222545	4.33425	4.359	4.16763	4.17335
1552777_a_at	RAET1E	135250	3.03342	3.04292	3.2138	3.1435
1552779_a_at	SLC44A5	204962	2.87605	2.95092	2.72375	2.5552
1552782_at	SLC44A5	204962	4.17322	3.89858	3.47032	3.3105
1552783_at	ZNF417	147687	2.33472	2.27985	2.32552	2.42767
1552785_at	ZNF781	163115	2.47582	2.36112	2.57995	2.73427
1552787_at	HELB	92797	3.41432	3.43332	3.48787	3.32842
1552788_a_at	HELB	92797	4.32445	4.4513	4.5058	4.5576
1552789_at	SEC62	7095	5.58795	5.66725	5.64078	6.04688
1552790_a_at	SEC62	7095	7.3829	7.5518	7.20317	7.60915
1552791_a_at	TRDN	10345	2.32235	2.16475	2.29745	2.19982
1552792_at	SOCS4	122809	3.27377	3.1872	4.03063	4.17692
1552793_at	C8orf31	286122	3.44037	3.46865	3.35045	3.3413
1552794_a_at	ZNF547	284306	3.7335	3.3636	2.95955	2.90195
1552796_a_at	SIM1	6492	3.24257	3.3284	3.12633	3.12975
1552797_s_at	PROM2	150696	2.64015	2.53478	2.5511	2.54697
1552798_a_at	TLR4	7099	6.33582	6.22063	6.66993	6.3583
1552799_at	TSNARE1	203062	3.31668	3.50085	3.18323	3.32612
1552800_at	ABHD11	83451	5.88445	5.72082	5.68047	5.67692
1552801_at	CAPN13	92291	2.35832	2.3754	2.31692	2.27768
1552803_a_at	STMN1	3925	2.8896	2.7175	2.70788	2.75163
1552804_a_at	TIRAP	114609	5.26525	5.21477	4.94125	5.01452
1552806_a_at	NA	NA	3.02725	3.18368	3.04648	3.09603
1552807_a_at	NA	NA	4.3123	4.1819	4.2155	4.2461
1552808_at	ADAMTSL1	92949	2.55235	2.6503	2.5443	2.56367
1552809_at	RFX4	5992	2.594	2.68965	2.5313	2.66718
1552811_at	WFIKKN1	117166	5.83455	5.7942	5.54195	5.52365
1552812_a_at	SENP1	29843	4.1634	4.16715	5.1172	5.24965
1552813_at	KLF14	136259	4.33355	4.20913	4.06658	4.07955
1552814_a_at	KLF14	136259	2.84035	2.84095	2.85345	2.74512
1552816_at	NXNL2	158046	3.27603	3.07477	2.88625	2.92165
1552818_a_at	BRS3	680	2.645	2.7449	2.6126	2.57123
1552819_at	NCRNA00205	257103	4.02835	4.0498	3.7913	3.9687
1552822_at	TMX3	54495	2.9761	3.14075	2.8838	2.83545
1552825_at	ZNF396	252884	2.25775	2.19187	2.34645	2.27977
1552826_at	SLC26A7	115111	2.21945	2.08132	2.02035	2.0838
1552827_s_at	SLC26A7	115111	2.60225	2.72235	2.5707	2.53373
1552828_at	SNX18	112574	4.31953	4.38467	4.37315	4.38445
1552829_at	NA	NA	4.03135	4.13355	3.99605	3.96798
1552830_at	FBXO39	162517	3.90397	3.86413	3.58485	3.66515
1552833_at	B3GNT6	192134	4.37387	4.5119	4.32137	4.2802
1552834_at	B3GNT6	192134	4.75165	4.73757	4.57708	4.66067
1552835_at	DENND1B	163486	2.68465	2.60892	2.64853	2.60907
1552836_at	ZNF619	285267	5.00365	5.0719	5.19885	5.41615
1552837_at	ICK	22858	2.03905	2.07303	2.02028	1.91647
1552839_at	FAM71D	161142	2.6495	2.62672	2.4388	2.6122
1552841_s_at	BCL2L14	79370	2.81758	2.87772	2.64615	2.55598
1552842_at	HS6ST3	266722	3.31785	3.40373	3.44265	3.5179
1552843_at	SLC26A1	10861	2.8022	2.90347	2.79443	2.8079
1552845_at	CLDN15	24146	6.02482	5.90633	5.56935	5.4916
1552846_s_at	RAB42	115273	5.41245	5.28763	6.40022	6.0932
1552848_a_at	PTCHD1	139411	2.59857	2.7516	2.68535	2.87807
1552849_at	C2orf65	130951	2.14605	2.13817	2.14118	2.1563
1552851_at	ZSCAN4	201516	2.39452	2.40125	2.45772	2.33965
1552852_a_at	ZSCAN4	201516	2.7249	2.76178	2.55903	2.49815
1552853_at	VWA5B1	127731	3.65777	3.85525	3.5152	3.46923
1552854_a_at	VWA5B1	127731	3.6741	3.80737	3.63768	3.67155
1552856_at	TMEM148	197196	2.7398	2.83317	2.86245	2.90805
1552857_a_at	HTR6	3362	3.1574	3.33788	2.99825	2.99323
1552858_at	MAGEB6	158809	1.96807	1.918	2.14628	2.1478
1552860_at	TCEB3C	162699	2.7876	2.86917	2.8721	2.8233
1552862_at	C1orf104	284618	5.97527	5.80193	5.77985	5.68368
1552863_a_at	CACNG6	59285	6.11757	6.09795	6.22872	6.13075
1552865_a_at	IFLTD1	160492	4.0289	4.16478	4.1677	4.21465
1552867_at	NA	NA	3.57615	3.65013	3.71245	3.38545
1552868_at	C19orf23	148046	5.57118	5.5596	5.47987	5.514
1552870_s_at	C1orf125	126859	2.12068	2.16282	2.1395	2.06745
1552872_at	NCRNA00105	80161	4.7483	4.73025	3.87525	3.7165
1552873_s_at	NCRNA00105	80161	5.51953	5.5498	5.58718	5.56633
1552875_a_at	CD200R1	131450	2.1994	2.30213	2.13885	2.0585
1552876_at	C21orf89	114042	2.538	2.61777	2.72717	2.66637
1552877_s_at	C21orf89	114042	4.69728	4.80487	4.55205	4.75155
1552878_at	ATOH7	220202	2.2296	2.21485	2.10533	2.10562
1552879_a_at	ATOH7	220202	2.82322	2.85475	2.92678	2.83312
1552880_at	SEC16B	89866	2.43757	2.3964	2.44822	2.38725
1552882_a_at	FAM123B	139285	3.2414	3.1513	3.3118	3.52155
1552884_at	NKX6-3	157848	3.49752	3.5286	3.18005	3.3297
1552885_a_at	NKX6-3	157848	5.3235	5.2372	5.23645	5.0863
1552887_at	C10orf27	219793	3.4035	3.33195	3.05438	3.21195
1552889_a_at	EXOC3L2	90332	6.45522	6.52698	6.16003	6.21322
1552890_a_at	CABP4	57010	4.40845	4.4257	4.8461	4.7408
1552892_at	TNFRSF13C	115650	5.11702	5.17662	5.2358	5.21895
1552893_at	CAMK2N2	94032	5.4025	5.4046	5.4616	5.45193
1552895_a_at	C21orf99	149992	2.77135	2.82943	2.97957	3.06405
1552897_a_at	KCNG3	170850	2.32965	2.34733	2.2666	2.4622
1552898_a_at	KCNG3	170850	2.447	2.52707	2.37563	2.42705
1552899_at	RP4-662A9.2	154089	2.53812	2.49277	2.33427	2.28918
1552900_a_at	RP4-662A9.2	154089	2.50875	2.42663	2.3583	2.4075
1552902_a_at	FOXP2	93986	3.59975	3.51662	3.29563	3.26417
1552903_at	B4GALNT2	124872	3.40773	3.21235	3.25945	3.1779
1552904_at	NETO1	81832	2.13185	2.15765	2.01885	1.98368
1552906_at	FMR1NB	158521	2.04217	2.13213	2.06522	1.9494
1552908_at	C1orf150	148823	2.6172	2.42898	2.804	2.80973
1552910_at	SIGLEC11	114132	2.80608	2.7217	2.72872	2.66913
1552911_at	SIGLEC11	114132	3.20312	3.45965	3.16705	3.1274
1552912_a_at	IL23R	149233	2.25028	2.26748	2.2733	2.24245
1552913_at	MAGEB18	286514	1.9356	2.07793	1.9619	1.97475
1552914_a_at	CD276	80381	4.3821	4.47307	4.27353	4.2138
1552915_at	IL28A	282616	3.41455	3.17843	3.22133	3.28958
1552917_at	IL29	282618	3.80707	3.94773	3.68047	3.71352
1552919_at	C4orf36	132989	2.402	2.4717	2.48733	2.44477
1552921_a_at	FIGNL1	63979	5.6359	5.66825	7.65948	7.59243
1552922_at	RIMS1	22999	2.46913	2.41865	2.482	2.34318
1552923_a_at	PITPNM2	57605	3.737	3.59187	3.55408	3.47215
1552924_a_at	PITPNM2	57605	3.81867	3.8103	4.11195	4.0566
1552925_at	PCDH10	57575	6.3128	6.3734	3.59488	3.65848
1552927_at	TAB3	257397	2.73215	2.7019	2.76302	2.79407
1552928_s_at	TAB3	257397	2.62447	2.52758	2.74572	2.81153
1552929_at	GRK7	131890	2.6617	2.68237	2.49207	2.54743
1552930_at	MMEL1	79258	5.15855	5.11475	5.21508	5.17125
1552931_a_at	PDE8A	5151	5.2304	5.53087	5.75905	5.82043
1552932_at	NLRP6	171389	2.97825	2.98283	3.06945	2.95747
1552933_at	AKNAD1	254268	2.82978	2.85887	2.6729	2.73548
1552935_at	ZCCHC5	203430	4.51225	4.5193	4.62365	4.60853
1552937_s_at	ATRIP	84126	5.4751	5.53397	5.89725	5.87497
1552938_at	ZIC5	85416	3.02095	3.0276	2.85292	2.8228
1552939_at	ANGPT1	284	2.0385	2.10815	2.09327	1.99867
1552940_at	TEDDM1	127670	2.45535	2.45825	2.32972	2.41142
1552942_at	FLJ30430	149373	4.29825	4.3511	3.86913	3.99538
1552943_at	GABRG1	2565	2.14987	2.21077	2.29685	2.25845
1552944_a_at	PANX2	56666	5.58178	5.63945	5.44355	5.52632
1552946_at	ZNF114	163071	3.8737	3.90335	4.4797	4.55335
1552947_x_at	ZNF114	163071	3.83775	4.00207	4.3142	4.38775
1552948_at	CCDC27	148870	4.77562	4.92625	4.65335	4.53355
1552950_at	C15orf26	161502	2.18973	2.2251	2.262	2.3004
1552952_at	RBMY2FP	159162	2.5023	2.54087	2.54355	2.5671
1552953_a_at	NEUROD2	4761	4.87705	4.80695	4.77385	4.71258
1552954_at	C5orf17	439936	3.1126	3.12455	3.20552	3.09658
1552955_at	NA	NA	4.41097	4.57305	4.45365	4.54973
1552957_at	DNAH6	1768	2.1945	2.33363	2.54655	2.3815
1552960_at	LRRC15	131578	4.44538	4.4397	4.35507	4.5264
1552961_at	NA	NA	3.6797	3.64878	3.60725	3.65912
1552964_at	C10orf93	255352	4.17842	4.13482	4.11335	4.02645
1552965_a_at	B3GNT7	93010	3.33637	3.25245	3.2657	3.1533
1552967_at	ZNF645	158506	3.85597	3.77247	3.5575	3.59632
1552969_a_at	ZMYM6	9204	2.68675	2.6317	2.75712	2.59762
1552970_s_at	ZMYM6	9204	2.64892	2.81987	2.7309	2.78417
1552971_at	SGCZ	137868	2.6091	2.77788	2.6523	2.7049
1552972_at	NA	NA	1.8857	1.79977	2.01065	1.96638
1552973_at	WNT9B	7484	3.2302	3.19615	3.15473	3.0824
1552974_at	NA	NA	2.1402	2.1958	2.00825	2.01775
1552975_x_at	NA	NA	3.02837	3.03547	2.99892	2.88077
1552976_at	DNAJB13	374407	3.99848	3.89647	3.7189	3.7445
1552977_a_at	CNPY3	10695	7.02893	7.0066	7.72722	7.68208
1552978_a_at	SCAMP1	9522	7.4867	7.46515	7.834	7.7575
1552979_at	C2orf52	151477	2.43978	2.45918	2.65245	2.59675
1552980_at	HAS3	3038	4.14775	3.94855	4.18545	4.06692
1552982_a_at	FGF4	2249	3.32063	3.44743	3.27588	3.30957
1552985_at	SLC30A8	169026	3.7807	3.65998	3.3375	3.60695
1552986_at	LOC142937	142937	3.96615	4.06943	4.02815	3.982
1552987_a_at	MGC42157	439933	1.97985	1.89805	1.87177	1.94868
1552988_at	C11orf65	160140	2.29767	2.21117	2.22505	2.19382
1552990_at	FAM71E2	284418	3.1331	3.13465	2.8687	2.84368
1552991_at	OR5P2	120065	2.8531	2.70188	2.77185	2.81875
1552993_at	DYDC1	143241	2.23435	2.21698	2.24127	2.1311
1552995_at	IL27	246778	5.30312	5.28748	5.12453	5.17427
1552997_a_at	IQCF1	132141	4.6885	4.64677	4.61522	4.54605
1552998_at	DEFB125	245938	2.64278	2.67395	2.6061	2.80322
1552999_a_at	WFDC10B	280664	3.20633	3.19245	3.23043	3.20243
1553002_at	NA	NA	2.78198	2.7577	2.72255	2.7754
1553003_at	PKHD1	5314	3.10015	2.93663	3.03238	2.907
1553004_at	PKD1L1	168507	3.17692	3.25948	2.96613	3.02228
1553006_at	GPR112	139378	3.3574	3.32105	3.18922	3.29692
1553007_a_at	ODZ1	10178	3.39255	3.31577	3.5201	3.40407
1553009_s_at	REXO1L1	254958	3.6928	3.5981	3.45665	3.48838
1553011_at	TAF1L	138474	3.37785	3.41635	3.53165	3.3131
1553013_at	CNTNAP5	129684	2.59465	2.53788	2.48733	2.5889
1553015_a_at	RECQL4	9401	6.44142	6.4813	7.61	7.58013
1553016_at	GPR113	165082	4.09163	4.13577	3.97555	3.97053
1553019_at	TMC2	117532	4.54295	4.58607	4.55877	4.54307
1553020_at	SMCR5	140771	2.87087	2.69378	2.7948	2.632
1553021_s_at	BICD2	23299	4.68743	4.68548	4.54425	4.51973
1553022_at	ZIM3	114026	2.3337	2.38915	2.3212	2.1795
1553023_a_at	NOX5	79400	3.27578	3.3093	3.35798	3.3335
1553024_at	G30	282706	2.1529	2.27562	2.25615	2.17828
1553025_at	GPR126	57211	2.4523	2.56843	2.48247	2.35885
1553027_a_at	KLHL4	56062	5.73508	5.7699	5.19498	4.8901
1553028_at	GPR156	165829	3.57068	3.78507	3.4767	3.4947
1553030_a_at	SUOX	6821	5.3878	5.41617	5.11247	5.07372
1553031_at	GPR115	221393	3.68217	3.85153	3.74625	3.68982
1553032_at	IL31RA	133396	2.5641	2.70432	2.50913	2.5334
1553033_at	SYTL5	94122	2.72318	2.77038	2.6839	2.75882
1553034_at	SDCCAG8	10806	5.62392	5.77415	4.84135	4.67572
1553036_at	GPR111	222611	2.47625	2.60832	2.55315	2.51265
1553037_a_at	SYN2	6854	2.80763	2.86865	2.60067	2.67053
1553039_a_at	ASB10	136371	7.03285	7.09312	6.84685	6.79745
1553041_at	HTR3C	170572	3.77335	3.8873	3.65282	3.66435
1553042_a_at	NFKBID	84807	4.85177	4.89897	4.86745	4.69473
1553043_a_at	CD300LF	146722	3.0926	3.16695	3.20342	3.0742
1553044_at	GJA10	84694	3.58642	3.53645	3.44548	3.52225
1553045_at	WNT9A	7483	4.10803	4.2319	4.1751	4.053
1553046_s_at	GAL3ST2	64090	5.8835	5.86565	5.58715	5.58315
1553047_at	PIP4K2B	8396	5.42745	5.33498	5.3208	5.32773
1553048_a_at	PIP4K2B	8396	5.8574	5.83155	5.75343	5.90715
1553051_s_at	ODF3	113746	3.6279	3.63465	3.65735	3.62633
1553052_at	WFDC13	164237	2.3905	2.4968	2.51645	2.54765
1553053_at	C14orf48	256369	3.3209	3.31768	3.24665	3.3335
1553055_a_at	SLFN5	162394	3.44023	3.20763	4.05922	3.69627
1553057_at	SERPINB12	89777	3.42695	3.5245	3.26032	3.4102
1553058_at	GIPC3	126326	3.48843	3.43968	3.42375	3.44985
1553059_at	PGLYRP3	114771	2.78682	2.84558	2.75275	2.6936
1553060_at	PSKH2	85481	4.18522	4.16145	4.07357	4.09793
1553061_at	OR6W1P	89883	3.50352	3.38605	3.28217	3.44168
1553062_at	MOGAT1	116255	4.03843	4.12948	4.0835	4.01015
1553063_at	GPR78	27201	4.26985	4.30253	4.1536	4.00623
1553064_at	H1FOO	132243	4.44652	4.42605	4.467	4.50587
1553066_at	TAAR9	134860	3.18262	3.28113	3.40733	3.40402
1553067_a_at	GNRHR2	114814	4.1959	4.17065	4.1707	4.18058
1553069_at	C21orf87	257357	2.99143	2.90315	2.7987	2.7932
1553070_a_at	MYOZ3	91977	3.36993	3.23848	3.11265	3.37817
1553071_a_at	MYOZ3	91977	3.47157	3.60737	3.5391	3.70602
1553072_at	BNIPL	149428	3.38183	3.4016	3.37437	3.25727
1553074_at	ASB11	140456	3.21745	3.1005	3.13262	3.04137
1553075_a_at	OFCC1	266553	2.17633	2.19132	2.15483	2.23342
1553076_at	OFCC1	266553	2.82372	2.84488	2.95222	2.8762
1553077_at	SDR9C7	121214	2.36512	2.43437	2.4878	2.48895
1553078_at	OR5P3	120066	3.05032	3.00702	3.11255	3.16922
1553079_at	TRIM40	135644	2.67322	2.69828	2.69607	2.7094
1553080_at	CSN1S2A	286828	3.08177	3.1371	2.94422	2.91395
1553081_at	WFDC12	128488	5.74425	5.6015	5.54128	5.663
1553082_at	CRYGN	155051	3.04623	3.0957	2.89375	3.01368
1553083_at	NA	NA	3.85488	3.73367	3.57313	3.6731
1553084_at	STARD6	147323	3.13925	3.17667	2.99563	3.0065
1553086_at	C11orf40	143501	2.64653	2.7148	2.57725	2.7049
1553087_at	C18orf12	84322	3.68803	3.58615	3.4402	3.59147
1553088_a_at	BCL2L11	10018	6.04145	6.01823	5.89195	5.91887
1553089_a_at	WFDC2	10406	3.64705	3.61885	3.68045	3.62557
1553093_a_at	DEFB119	245932	2.93442	2.95907	2.88615	2.91628
1553094_at	TAC4	255061	3.8478	3.811	4.00385	3.99062
1553096_s_at	BCL2L11	10018	6.5584	6.47885	6.5534	6.60163
1553099_at	TIGD1	200765	6.30003	6.25832	6.53743	6.57023
1553101_a_at	ALKBH5	54890	7.76922	7.69155	8.1041	8.19745
1553102_a_at	CCDC69	26112	6.54325	6.2215	6.80992	6.43125
1553103_at	NFX1	4799	7.51345	7.52867	8.08302	7.96415
1553105_s_at	DSG2	1829	2.58767	2.60478	2.5489	2.61518
1553106_at	C5orf24	134553	6.96157	6.65532	6.95288	7.01683
1553107_s_at	C5orf24	134553	7.48725	7.37285	7.4265	7.41722
1553108_at	C5orf24	134553	5.86652	5.84733	6.0932	6.14268
1553111_a_at	KBTBD6	89890	5.97262	6.02677	6.54697	6.71507
1553112_s_at	CDK8	1024	5.86182	5.90215	5.91055	5.8891
1553113_s_at	CDK8	1024	7.29767	7.30877	7.27848	7.23015
1553114_a_at	PTK6	5753	4.51205	4.71082	4.5313	4.53935
1553115_at	NKD1	85407	4.24105	4.23968	4.2192	4.09715
1553117_a_at	STK38	11329	6.85778	6.73157	7.17555	7.14035
1553118_at	THEM4	117145	7.31245	7.22615	6.3194	6.3462
1553120_at	CLSPN	63967	3.01125	3.05505	4.9149	4.96425
1553122_s_at	RBAK	57786	3.0578	2.9989	3.15278	2.85795
1553123_at	WDR62	284403	3.49863	3.4618	3.51083	3.47415
1553125_x_at	WDR62	284403	3.47538	3.57508	3.7395	3.63965
1553126_a_at	SLC39A12	221074	2.09835	2.18075	2.21532	2.2902
1553127_a_at	RNF168	165918	2.76863	2.94543	2.8423	2.99032
1553129_at	SVEP1	79987	2.23245	2.14602	2.60257	2.54415
1553130_at	PRO0461	652276	5.25802	5.31217	5.09483	5.17292
1553131_a_at	GATA4	2626	5.71283	5.56657	5.55778	5.6276
1553132_a_at	TC2N	123036	2.01593	2.01455	2.0407	2.04407
1553133_at	C9orf72	203228	3.65143	3.71635	3.94283	3.79235
1553134_s_at	C9orf72	203228	2.12412	2.28843	2.1562	2.3316
1553136_at	KCTD18	130535	6.05127	5.99808	5.9215	5.88975
1553137_s_at	KLF11	8462	3.17442	3.18765	3.45245	3.45808
1553138_a_at	ANKLE1	126549	3.64832	3.68332	5.3513	5.45412
1553139_s_at	PLXNA3	55558	3.91637	3.7922	3.63605	3.70682
1553140_at	PELO	53918	2.8423	2.90877	3.51628	3.5793
1553141_at	C13orf31	144811	3.41787	3.39605	3.12755	3.08793
1553142_at	C13orf31	144811	2.73077	2.58235	2.6659	2.57035
1553145_at	FLJ39653	202020	4.40795	4.51945	3.49003	3.3837
1553146_at	C3orf30	152405	2.53592	2.4151	2.418	2.3928
1553147_at	RANBP3L	202151	2.18805	2.14958	2.09835	2.22677
1553148_a_at	SNX13	23161	5.02265	5.26685	5.6023	5.47562
1553150_at	KDM1B	221656	2.2407	2.48905	2.48365	2.4673
1553151_at	ATP6V0D2	245972	2.96513	2.85968	2.93583	3.08993
1553153_at	ATP6V0D2	245972	4.10708	4.04422	4.0497	4.17133
1553155_x_at	ATP6V0D2	245972	3.275	3.19132	3.3271	3.29847
1553156_at	LHX4	89884	5.13407	5.08588	4.9034	4.89425
1553157_at	LHX4	89884	3.2962	3.21915	3.18332	3.2479
1553158_at	C3orf34	84984	4.68977	4.59337	4.83007	4.7298
1553159_at	DNAH11	8701	5.17067	5.11355	5.0229	5.0271
1553162_x_at	C19orf55	148137	5.98952	5.9381	6.30935	6.3452
1553163_at	ADPRHL1	113622	5.1399	5.18618	5.08617	5.08502
1553165_at	SYNRG	11276	4.47978	4.44315	4.59497	4.52315
1553166_at	CDH24	64403	5.49172	5.55443	5.36325	5.39147
1553167_a_at	SEPSECS	51091	4.96247	4.76323	4.9401	4.79232
1553168_at	GRIK5	2901	4.38488	4.45025	4.2545	4.46625
1553169_at	LRRN4	164312	4.0401	4.21392	4.15562	4.1197
1553171_x_at	LRRN4	164312	3.54917	3.44537	3.44968	3.58225
1553172_at	ZNF777	27153	6.49233	6.5492	6.70547	6.6419
1553174_at	JPH2	57158	5.39133	5.4823	5.18615	5.27787
1553175_s_at	PDE5A	8654	3.608	3.55713	3.64607	3.70685
1553176_at	SH2D1B	117157	2.9778	3.012	2.91432	2.96787
1553177_at	SH2D1B	117157	3.31378	3.25565	3.19118	3.3809
1553178_a_at	SSTR3	6753	6.01973	6.06272	6.03043	5.91523
1553179_at	ADAMTS19	171019	2.92807	3.20642	3.33422	3.01072
1553180_at	ADAMTS19	171019	2.2805	2.24615	2.37235	2.37157
1553181_at	DDX31	64794	4.28723	4.29748	4.13052	4.14095
1553183_at	UMODL1	89766	2.29928	2.38525	2.39847	2.34862
1553185_at	RASEF	158158	7.95338	7.9359	8.01993	7.97628
1553186_x_at	RASEF	158158	7.57102	7.41222	7.52217	7.6049
1553188_s_at	PARD3B	117583	3.38545	3.37955	3.13212	3.30305
1553190_s_at	PARD3B	117583	5.2442	5.20437	4.9926	4.9689
1553191_at	DST	667	2.27763	2.2277	2.3673	2.44588
1553192_at	ZNF441	126068	3.01995	2.92935	3.141	3.09645
1553193_at	ZNF441	126068	3.5657	3.53255	3.92037	3.86157
1553194_at	NEGR1	257194	4.91175	5.2157	4.1885	4.45482
1553196_a_at	FCRL3	115352	2.9371	2.97178	2.6566	2.717
1553197_at	DCAF4L2	138009	2.615	2.4884	2.62815	2.70705
1553199_at	DCAF4L2	138009	2.19683	2.31853	2.26425	2.17425
1553202_at	STOX1	219736	3.18498	3.30505	5.40728	5.28428
1553204_at	C20orf200	253868	3.88247	3.77923	3.8694	3.85915
1553205_at	C20orf200	253868	5.24017	5.2122	5.02417	4.9079
1553207_at	ARL10	285598	4.7224	4.87035	4.73498	4.58822
1553208_s_at	ARL10	285598	2.94065	2.84473	2.8485	2.9349
1553209_at	RNFT2	84900	3.57602	3.65548	3.78967	3.76318
1553211_at	ANKFN1	162282	2.8855	2.9115	2.82595	2.89412
1553212_at	KRT78	196374	4.08718	4.0483	3.97533	3.9678
1553213_a_at	KRT78	196374	2.70875	2.60747	2.75748	2.60045
1553214_a_at	CCDC7	221016	1.98232	2.09027	1.95752	2.04497
1553215_s_at	CCDC7	221016	3.09077	2.89137	2.66495	2.6751
1553216_at	ZNF41	7592	3.97748	4.1504	3.9233	3.98137
1553217_s_at	ZNF41	7592	3.88983	3.84355	3.9081	3.86583
1553218_a_at	ZNF512	84450	7.62925	7.60262	7.9401	7.78718
1553219_a_at	AMMECR1	9949	3.75047	3.92475	3.76025	3.9308
1553220_at	FAM117B	150864	3.57167	3.74987	3.7402	3.87045
1553221_at	ZNF583	147949	4.45298	4.36665	3.81407	3.63435
1553222_at	OXER1	165140	6.87177	6.91033	6.68197	6.71177
1553224_at	LUZP1	7798	5.096	5.06628	4.7942	4.83292
1553225_s_at	ZNF75D	7626	4.1018	4.22637	4.45695	4.26248
1553226_at	NCRNA00052	145978	2.57052	2.64255	2.37778	2.48822
1553227_s_at	BRWD1	54014	4.96797	5.08425	5.3981	5.62512
1553228_at	CCDC89	220388	2.47215	2.38232	2.42805	2.41202
1553229_at	ZNF572	137209	4.00575	3.9691	4.8876	4.83167
1553232_at	FAM82A1	151393	3.43542	3.3173	3.21355	3.24117
1553234_at	ADAMTS18	170692	4.9311	5.2423	3.9411	4.17683
1553235_at	PCDHAC1	56135	4.70167	4.5819	4.42623	4.3727
1553237_x_at	PCDHAC1	56135	4.3554	4.33265	4.21012	4.1432
1553238_a_at	HIPK4	147746	5.7071	5.6397	5.7292	5.60125
1553239_at	FAM124A	220108	4.9912	5.1594	4.87957	4.96192
1553241_at	NKAIN3	286183	3.1753	3.17253	2.89443	3.053
1553243_at	ITIH5	80760	2.4903	2.50913	2.56835	2.51558
1553244_at	FANCB	2187	4.11355	4.07263	6.1243	6.30205
1553246_a_at	SGK196	84197	5.11685	5.14418	4.9037	5.02202
1553247_a_at	ZNF709	163051	3.7804	3.88637	4.0908	4.04343
1553248_at	CCDC57	284001	4.46595	4.58927	4.68538	4.6461
1553249_at	SMC1B	27127	3.20947	3.27685	3.24325	3.16805
1553252_a_at	BRWD3	254065	5.5816	5.86172	5.59117	5.67635
1553253_at	ASB16	92591	5.05218	5.1145	4.84482	4.93797
1553254_at	MAGEE2	139599	2.8927	2.91245	2.8426	2.84505
1553255_at	HERV-V1	147664	5.11685	5.07605	4.94085	5.0582
1553257_at	GAL3ST3	89792	5.0812	5.1293	5.1025	5.07963
1553258_at	FLJ30679	146512	4.46535	4.4677	4.35995	4.48663
1553260_s_at	ALS2CR11	151254	2.00583	2.00515	2.02447	2.15563
1553261_x_at	ALS2CR11	151254	2.18217	2.23323	2.02497	2.13025
1553262_a_at	UTS2R	2837	6.757	6.701	6.67735	6.5707
1553263_at	USH1G	124590	5.779	5.73387	5.5716	5.59065
1553264_a_at	SYN1	6853	5.12172	5.03793	4.91948	5.02875
1553265_at	SLC23A3	151295	4.719	4.51187	5.10553	4.7625
1553266_at	CNOT6L	246175	1.96315	1.9481	2.06395	1.9303
1553267_a_at	CNOT6L	246175	2.6472	2.7927	2.99835	2.92635
1553268_at	RHBDL3	162494	4.11035	4.23445	4.06982	4.01575
1553269_at	NA	NA	5.02937	5.0401	6.53755	6.57987
1553271_at	DIP2B	57609	2.4069	2.56648	2.44883	2.5104
1553272_at	SLC36A1	206358	4.63213	4.50877	4.50427	4.4596
1553274_a_at	SNRNP48	154007	6.89425	6.69583	7.00965	7.22588
1553275_s_at	NA	NA	3.923	3.844	3.20283	3.29527
1553276_at	ZNF560	147741	2.2402	2.24245	2.27203	2.39682
1553277_at	RTTN	25914	2.07048	2.20673	2.35608	2.26562
1553279_at	BTNL9	153579	5.36123	5.3631	5.12692	5.24295
1553280_at	PUS10	150962	5.21085	5.1829	5.04105	5.06212
1553281_at	PLCXD2	257068	4.15968	4.0632	3.9165	3.98552
1553282_at	C21orf128	150147	3.9533	3.6823	3.6855	3.58282
1553284_s_at	LMLN	89782	3.06542	3.2289	3.18197	3.16423
1553285_s_at	RAD9B	144715	2.55483	2.6699	2.8368	2.87807
1553286_at	ZNF555	148254	6.61052	6.593	6.5597	6.60168
1553288_a_at	C7orf51	222950	4.95118	4.90813	4.20255	4.1478
1553292_s_at	FLJ25006	124923	5.2862	5.29502	6.03463	5.99958
1553293_at	MRGPRX3	117195	2.65678	2.673	2.55052	2.6592
1553295_at	ABCA13	154664	2.19278	2.07522	2.12957	2.28218
1553296_at	GPR128	84873	2.4532	2.40048	2.26162	2.2419
1553297_a_at	CSF3R	1441	5.30605	5.24695	5.13882	5.2628
1553298_at	C17orf77	146723	2.13687	2.27608	2.1625	2.23157
1553299_at	DUSP5P	574029	2.75962	2.6354	2.6674	2.69585
1553300_a_at	DGKH	160851	4.03225	4.01412	4.03625	4.02915
1553301_a_at	TMEM182	130827	2.82552	2.72375	2.74895	2.61112
1553303_at	C16orf46	123775	4.38848	4.52118	4.38685	4.36575
1553304_at	LSM14B	149986	5.70667	5.50195	5.89398	6.07838
1553306_at	CASP8	841	3.22185	3.16287	2.90825	2.94367
1553310_at	PLB1	151056	2.28785	2.41073	2.27802	2.22652
1553311_at	C20orf197	284756	1.9809	2.08613	2.1709	1.97062
1553313_s_at	SLC5A3	6526	3.87625	3.91437	4.14062	4.45838
1553314_a_at	KIF19	124602	3.3157	3.50237	3.03853	3.04913
1553315_at	SLFNL1	200172	2.44592	2.4771	2.50675	2.5016
1553316_at	GPR82	27197	3.62925	3.6408	3.4075	3.45552
1553317_s_at	GPR82	27197	2.06257	2.11137	2.02095	2.22503
1553318_at	RIBC1	158787	5.04068	4.9907	4.6962	4.86377
1553319_at	OXGR1	27199	3.31452	3.47278	3.19192	3.103
1553320_s_at	NA	NA	2.04478	2.13373	2.10078	1.96712
1553321_a_at	SULT1C4	27233	3.68167	3.79318	3.10505	3.13885
1553322_s_at	TEAD1	7003	4.05893	3.93487	5.04073	4.98975
1553323_a_at	CATSPER2	117155	3.95427	3.92075	3.83502	4.00542
1553325_at	POU5F2	134187	3.67287	3.6759	3.53295	3.46258
1553326_at	RXFP2	122042	2.78395	2.72575	2.70385	2.77975
1553327_a_at	BEND7	222389	3.31053	3.14627	3.02975	3.19227
1553328_a_at	SLC18A2	6571	3.1613	3.10842	3.07205	3.11035
1553329_at	C7orf45	136263	2.50937	2.41765	2.42448	2.4454
1553330_at	C7orf45	136263	2.03225	2.22472	2.14568	2.22273
1553333_at	C1orf161	126868	2.11635	2.0361	2.16487	2.22395
1553335_x_at	LOC285696	285696	2.7633	2.7582	2.71825	2.83312
1553336_a_at	MIER3	166968	2.91718	3.02973	2.9228	3.01063
1553338_at	C1orf55	163859	4.9817	4.94655	5.13603	5.04675
1553340_s_at	NA	NA	5.44803	5.36118	5.27245	5.21175
1553341_at	UROC1	131669	3.41898	3.43182	3.4289	3.4351
1553344_at	PCDH15	65217	2.078	2.18153	2.13008	2.09835
1553346_a_at	TNRC6A	27327	4.1285	4.18312	4.0799	4.1598
1553347_s_at	KCNA6	3742	3.6931	3.73013	3.52473	3.54743
1553348_a_at	NFX1	4799	4.573	4.41423	4.6525	4.47288
1553349_at	ARID2	196528	5.1287	5.27738	4.78655	4.96932
1553350_at	FAM123C	205147	3.6737	3.84618	3.64435	3.62272
1553351_at	OTUD7A	161725	3.5666	3.59863	3.56597	3.64812
1553352_x_at	ERVWE1	30816	3.9475	3.7704	4.00638	3.94512
1553354_a_at	FLJ31958	143153	4.17008	4.11373	4.14705	4.28988
1553355_at	NA	NA	3.4045	3.62582	3.13068	3.26063
1553356_at	NA	NA	2.27188	2.3996	2.18895	2.33818
1553357_at	LOC158696	158696	2.41158	2.4937	2.45282	2.3496
1553359_at	FBXL18	80028	6.55935	6.595	6.34223	6.41427
1553361_x_at	FBXL18	80028	6.2948	6.34507	6.24965	6.21237
1553362_at	DNAH6	1768	1.87498	1.93598	1.9349	1.90335
1553363_at	C6orf195	154386	3.0107	2.831	2.85757	2.86177
1553364_at	PNPLA1	285848	3.06235	3.07435	3.14535	3.1496
1553365_at	DEPDC4	120863	2.90125	3.0204	2.86433	2.7947
1553366_s_at	NA	NA	4.95065	4.98975	4.94548	5.15278
1553367_a_at	COX6B2	125965	4.71053	4.5683	4.3868	4.40578
1553369_at	FAM129C	199786	3.66645	3.70823	3.58792	3.47335
1553371_at	EPHA10	284656	2.78773	2.7908	2.7575	2.63275
1553372_at	FLJ23865	200317	3.51323	3.60292	3.55323	3.43765
1553373_at	WDR64	128025	2.6363	2.68222	2.83165	2.8467
1553374_at	PRO2949	55412	2.46525	2.69217	2.66695	2.53972
1553375_at	BTBD9	114781	3.57315	3.5651	3.516	3.63945
1553376_a_at	C1orf125	126859	2.67965	2.8138	2.72935	2.65892
1553378_a_at	C17orf66	256957	3.28228	3.2779	3.14717	3.2209
1553380_at	PARP15	165631	2.42083	2.50615	2.21422	2.4147
1553383_at	FLJ32810	143872	2.1086	2.12743	2.31285	2.1883
1553385_at	LOC84931	84931	4.90343	4.73318	4.83133	4.74478
1553386_at	MFSD2A	84879	4.09532	4.07127	3.9853	4.02952
1553387_at	ATM	472	3.00322	2.96333	3.1353	3.0266
1553388_at	FAM26D	221301	2.58078	2.62293	2.76842	2.61195
1553389_at	NPHP3	27031	3.40412	3.35635	3.40385	3.49195
1553390_at	ATG9B	285973	3.00233	2.8854	3.05443	3.00077
1553391_at	CXorf58	254158	2.56517	2.53373	2.43238	2.5919
1553392_at	EFCAB3	146779	2.4204	2.47958	2.51878	2.46243
1553394_a_at	TFAP2B	7021	2.61622	2.31985	2.45498	2.42725
1553395_a_at	CD200R1	131450	3.12628	2.97748	3.00902	2.93572
1553396_a_at	CCDC13	152206	4.5542	4.5548	3.68308	3.83865
1553397_at	CCDC13	152206	5.95875	5.99825	5.9227	5.923
1553398_at	NA	NA	3.0619	3.02442	3.06647	3.019
1553399_a_at	C17orf69	147081	5.7377	5.70503	5.57322	5.63262
1553400_a_at	C17orf69	147081	4.80795	4.90295	4.54913	4.66435
1553401_at	MRGPRX1	259249	2.81845	2.84857	2.72575	2.81845
1553402_a_at	HFE	3077	2.6491	2.40428	3.24705	3.143
1553403_at	RLN3	117579	3.5135	3.4955	3.35875	3.49615
1553405_a_at	CSMD1	64478	3.12843	3.22622	2.57897	2.4991
1553407_at	MACF1	23499	5.22768	5.14048	4.72023	4.59258
1553409_at	ADAMTS20	80070	2.5446	2.72685	2.53362	2.46847
1553410_a_at	ABCC12	94160	3.2481	3.16763	3.13267	3.06827
1553411_s_at	SALL3	27164	2.20432	2.25343	2.20598	2.26463
1553412_at	AGBL4	84871	4.0582	4.18265	4.06725	4.0542
1553413_at	FLJ13744	80078	3.54038	3.64538	3.55877	3.46258
1553415_at	SLC17A8	246213	2.17842	2.0824	2.18507	2.12915
1553417_at	C11orf44	283171	3.1922	3.15912	3.1786	3.17882
1553418_a_at	CNTNAP5	129684	3.40595	3.40688	3.29038	3.2279
1553420_at	FLJ32063	150538	2.44923	2.51015	2.5423	2.416
1553422_s_at	A2BP1	54715	3.83838	3.80305	3.81665	3.8434
1553423_a_at	SLFN13	146857	2.41575	2.55767	6.319	6.1853
1553424_at	C12orf40	283461	2.5586	2.57195	2.56802	2.52595
1553425_at	WDR65	149465	3.1015	3.1524	2.9028	2.96035
1553426_at	FLJ37543	285668	2.66032	2.74075	2.65578	2.57727
1553427_at	ADAMTS15	170689	3.99253	4.12875	3.91263	3.84735
1553428_at	RP3-398D13.1	285780	2.43463	2.56517	2.39875	2.35695
1553429_at	FLJ31713	158263	3.97347	4.05385	3.82788	3.902
1553430_a_at	EDARADD	128178	2.93375	2.86155	2.92685	2.93202
1553432_s_at	NA	NA	3.17185	3.21372	2.96718	3.16352
1553433_at	C9orf93	203238	2.14098	2.0305	2.14302	2.1709
1553434_at	CYP4Z2P	163720	2.53008	2.6135	2.66308	2.60688
1553435_at	C18orf15	147276	3.85142	3.67592	3.61008	3.70682
1553436_at	MUC19	283463	3.16523	3.26262	2.72703	3.01392
1553437_at	KLHDC7A	127707	3.6735	3.86817	3.37995	3.43195
1553438_at	C11orf72	283135	6.1557	6.26053	6.1473	6.0567
1553439_at	NA	NA	4.29487	4.44838	4.50023	4.41913
1553440_at	C18orf16	147429	2.11468	2.1342	2.1048	2.20338
1553441_at	CNTNAP4	85445	1.93912	2.04482	2.12043	2.0377
1553442_a_at	CNTNAP4	85445	2.71825	2.72637	2.6032	2.54622
1553443_at	C8orf54	439941	2.53333	2.54588	2.52768	2.3925
1553444_a_at	C1orf127	148345	5.3943	5.34863	5.46828	5.33805
1553446_at	FLJ37396	285754	2.50152	2.47935	2.5866	2.56427
1553447_at	AGBL1	123624	3.40685	3.32955	3.25208	3.09992
1553448_at	FLJ34503	285759	3.77115	3.558	3.31402	3.06505
1553449_at	C16orf81	283860	3.83155	3.65473	3.58778	3.53792
1553450_s_at	C16orf81	283860	2.7624	2.69077	2.63605	2.6671
1553451_at	CCDC79	283847	2.8946	2.79957	2.74265	2.82238
1553452_at	MYO1H	283446	2.4885	2.47328	2.30023	2.30198
1553453_at	ASB14	142686	2.78855	2.78	2.76555	2.69685
1553454_at	RPTN	126638	2.26082	2.3545	2.32715	2.23782
1553456_at	NA	NA	2.7386	2.65923	2.73765	2.69963
1553457_at	CXorf62	439943	4.2793	4.11795	4.09405	3.94497
1553458_at	C10orf72	196740	3.78835	3.71692	3.4662	3.59095
1553459_at	CCDC150	284992	3.86077	3.86238	4.28655	4.31677
1553460_at	C2orf61	285051	3.8205	3.90565	3.8349	3.79487
1553461_at	FAM9B	171483	2.6366	2.75475	2.73873	2.70777
1553462_at	NA	NA	2.12933	2.2496	2.2803	2.13668
1553464_at	FLJ40288	286023	5.92035	5.8462	5.75585	5.7767
1553465_a_at	CES7	221223	2.72437	2.83708	2.6109	2.59655
1553466_at	CXorf59	286464	3.59063	3.51695	3.33288	3.45613
1553467_at	FLJ32742	439944	2.98033	3.01143	2.9358	3.06547
1553468_at	NA	NA	2.66417	2.80333	2.92263	2.7084
1553470_at	DNAH17	8632	3.89858	3.9594	3.69593	3.70003
1553471_at	AMAC1	146861	2.77243	2.70345	2.82325	2.68637
1553472_at	FLJ32955	150596	2.5141	2.5125	2.47945	2.52295
1553474_at	POTED	317754	2.06335	1.93683	1.95598	1.98243
1553475_at	PRO1483	55448	2.96485	2.99317	2.92863	2.92243
1553478_at	PRR10	283165	3.55123	3.53592	3.39278	3.38215
1553479_at	TMEM145	284339	4.3021	4.42678	4.76845	4.89197
1553482_at	C15orf32	145858	3.2682	3.2222	3.15343	3.12567
1553483_at	TSGA10IP	254187	5.11893	5.24045	4.97465	5.03475
1553484_at	C12orf67	144360	2.49702	2.70913	2.58955	2.53415
1553485_at	CCDC140	151278	2.46877	2.48278	2.4439	2.5442
1553486_a_at	C17orf78	284099	2.53327	2.6967	2.56815	2.62085
1553488_at	TEKT5	146279	4.27675	4.25715	4.1669	4.01945
1553489_a_at	TEKT5	146279	4.25665	4.2949	4.05713	4.1259
1553491_at	KSR2	283455	3.31753	3.38875	3.18212	3.13322
1553492_a_at	PAX1	5075	2.80952	2.7427	2.67973	2.64965
1553493_a_at	TDH	157739	4.357	4.42588	4.17347	4.2914
1553494_at	TDH	157739	2.07747	2.15	2.1409	2.2455
1553497_at	C12orf37	439916	2.36238	2.30703	2.3098	2.1648
1553498_at	NA	NA	3.25963	3.22625	3.29192	3.4225
1553499_s_at	SERPINA9	327657	5.1531	5.08838	5.04413	5.10535
1553500_at	FBXL21	26223	3.6653	3.82175	3.76337	3.63035
1553502_a_at	NA	NA	3.30745	3.28045	3.3016	3.24388
1553504_at	MRGPRX4	117196	2.86998	2.87335	2.977	2.879
1553505_at	A2ML1	144568	3.1986	3.23585	3.23188	3.2413
1553506_at	CPO	130749	3.03925	3.0797	3.12487	2.9738
1553507_a_at	GPR6	2830	4.84285	4.90142	4.7629	4.92425
1553508_at	MDS2	259283	3.04105	3.1707	3.12742	3.15445
1553510_s_at	RQCD1	9125	7.40382	7.4184	7.732	7.66392
1553511_at	GJD3	125111	4.90243	4.8669	4.71913	4.78035
1553512_at	HOXC12	3228	3.75985	3.75557	3.75023	3.7659
1553513_at	VNN3	55350	2.3962	2.40825	2.39925	2.36747
1553514_a_at	VNN3	55350	3.00122	3.0576	2.9927	3.0079
1553515_at	MYEOV2	150678	3.60405	3.71465	3.56237	3.4422
1553517_at	FERD3L	222894	4.47987	4.5381	4.11322	4.232
1553518_at	DEFT1P	170949	3.52567	3.4761	3.4131	3.4367
1553519_at	C21orf94	246705	2.31195	2.33125	2.11177	2.20483
1553521_at	NA	NA	2.84057	2.78735	2.83735	2.84083
1553523_at	NLRP14	338323	3.88935	3.94372	3.34738	3.4962
1553524_at	DGKB	1607	2.61055	2.6482	2.6322	2.63655
1553525_at	NLRP13	126204	5.31937	5.4808	5.37875	5.2346
1553526_at	NLRP8	126205	4.6563	4.65985	4.67337	4.65268
1553527_at	NLRP9	338321	4.0789	4.0534	4.03425	4.11725
1553528_a_at	TAF5	6877	5.9378	5.9083	7.97372	7.96745
1553529_at	TAS1R2	80834	3.96345	4.02375	3.89653	3.8823
1553530_a_at	ITGB1	3688	10.8914	11.0266	10.6198	10.5834
1553531_at	PCSK6	5046	3.04255	3.05585	2.97057	3.0221
1553532_a_at	ZNF341	84905	4.03183	4.0182	3.7571	3.85102
1553533_at	JPH1	56704	2.93995	3.02923	3.036	2.92553
1553534_at	NLRP10	338322	2.95505	3.05483	2.7391	2.78972
1553535_a_at	RANGAP1	5905	7.62482	7.60785	7.2416	7.15115
1553536_at	MBNL2	10150	3.18538	3.37367	3.1666	3.21008
1553537_at	KRT73	319101	2.79523	2.7553	2.85537	2.96145
1553538_s_at	NA	NA	13.5123	13.4069	12.7434	12.8099
1553539_at	KRT74	121391	4.44408	4.4233	4.47345	4.3757
1553540_a_at	SLC29A2	3177	4.72767	4.60865	4.48458	4.66098
1553541_at	LMX1A	4009	2.74775	2.61972	2.55555	2.63375
1553542_at	CCDC125	202243	4.6195	4.3875	5.19775	5.25122
1553544_at	GPR101	83550	4.2953	4.34475	4.17085	4.36125
1553545_at	ILDR1	286676	3.69845	3.72133	3.51152	3.51435
1553546_at	PRO2012	55478	2.09707	2.01012	1.9193	2.18642
1553547_at	NA	NA	2.83325	2.72018	2.7356	2.66662
1553549_at	VN1R2	317701	3.0412	3.06888	2.76928	3.07808
1553550_at	VN1R5	317705	3.22715	3.26437	3.0439	3.02435
1553551_s_at	LOC100131754	100131754	12.7002	12.678	12.3933	12.3105
1553552_at	TAAR8	83551	3.83632	3.83787	3.79045	3.80727
1553553_at	TAS2R39	259285	2.98773	2.96647	2.9961	3.12258
1553555_at	TAS2R38	5726	3.86877	3.75477	3.59052	3.9799
1553556_at	TAS2R40	259286	2.5242	2.47715	2.50568	2.58025
1553558_at	TAS2R41	259287	3.3722	3.26717	3.42013	3.33625
1553559_at	TMEM171	134285	5.39275	5.29565	5.68745	5.31248
1553560_at	VN1R4	317703	3.36037	3.31363	3.3204	3.48902
1553561_at	TAS2R50	259296	2.60818	2.70647	2.54223	2.7782
1553562_at	NA	NA	4.11265	3.94793	3.922	3.93883
1553564_at	MACROD2	140733	3.1905	3.17558	3.15397	3.23575
1553565_s_at	DDAH1	23576	4.9542	4.94757	5.1222	4.98097
1553566_at	C12orf53	196500	3.9981	4.07713	3.92468	3.96705
1553567_s_at	LOC100133315	100133315	13.9093	13.8722	13.6849	13.686
1553568_a_at	HIST1H1T	3010	3.90292	3.7278	3.8804	3.63168
1553569_at	ZFYVE20	64145	14.1038	14.0985	14.0922	14.0524
1553570_x_at	ZFYVE20	64145	14.1302	14.1151	14.105	14.0658
1553572_a_at	CYGB	114757	5.62755	5.61618	5.94635	5.79153
1553573_s_at	EFNA2	1943	3.57935	3.75267	3.5805	3.4963
1553574_at	IFNE	338376	3.19357	3.24055	3.2953	2.98933
1553575_at	NA	NA	7.8744	7.87385	7.51807	7.67202
1553579_a_at	NA	NA	2.1906	2.24945	2.08577	2.14328
1553581_s_at	SFRS12IP1	285672	9.53175	9.4853	9.57297	9.5572
1553582_a_at	NA	NA	3.28335	3.30412	3.3507	3.44128
1553583_a_at	THRSP	7069	4.12678	4.14332	3.95827	3.9981
1553584_at	CXorf36	79742	4.75908	4.65102	4.13662	4.3692
1553585_a_at	MAGEA5	4104	2.96313	2.95605	2.75545	2.9021
1553586_at	NCRNA00095	283932	4.23625	4.39602	4.20685	4.2082
1553587_a_at	POLE4	56655	7.7367	7.78158	7.34927	7.37432
1553588_at	SH3KBP1	30011	14.2106	14.1888	13.9981	13.9834
1553589_a_at	PDZK1IP1	10158	3.0363	3.10485	3.22595	3.0984
1553590_at	FAM27E3	100131997	4.83607	4.8631	4.79535	4.80253
1553591_at	LOC100293142	100293142	3.85685	3.959	3.75323	3.78043
1553592_x_at	LOC100293142	100293142	4.60572	4.69052	4.49615	4.60447
1553593_a_at	TAL2	6887	3.6971	3.63892	3.7132	3.61187
1553594_a_at	NA	NA	4.65175	4.6763	4.41498	4.4338
1553599_a_at	SYCP3	50511	2.38575	2.32423	2.40627	2.44327
1553600_at	TMIE	259236	4.38482	4.2916	4.33878	4.27095
1553601_a_at	TMIE	259236	3.05915	3.22508	3.47372	3.23425
1553602_at	MUCL1	118430	3.9916	4.10248	4.0117	3.92505
1553603_s_at	ATL2	64225	4.7218	4.9608	5.55425	5.38455
1553604_at	ABCA13	154664	1.98578	2.06545	1.88505	1.99123
1553605_a_at	ABCA13	154664	2.07538	2.1736	2.0365	2.04617
1553607_at	NCRNA00189	193629	2.03285	2.1285	2.2167	2.1125
1553608_a_at	NCRNA00189	193629	2.53487	2.40848	2.5383	2.3989
1553611_s_at	KLHL35	283212	5.43215	5.46775	4.82165	4.95817
1553612_at	ZNF354B	117608	5.3036	5.30157	5.44422	5.43305
1553613_s_at	FOXC1	2296	9.42988	9.60328	3.7457	3.90862
1553614_a_at	FLJ25694	100128202	2.47138	2.42887	2.5232	2.55385
1553618_at	NA	NA	2.97328	2.94822	2.91693	2.7806
1553619_a_at	NA	NA	3.54385	3.53087	3.39325	3.42598
1553620_at	TRIM42	287015	2.63467	2.61947	2.5059	2.56248
1553622_a_at	FSIP1	161835	2.7673	2.81973	2.40777	2.3382
1553623_at	MGC15705	84843	3.01265	3.02995	2.94768	2.99375
1553625_at	FAM98B	283742	1.97865	2.09393	2.08767	2.06195
1553626_a_at	C17orf57	124989	3.01255	2.6876	2.72698	2.75882
1553627_s_at	C17orf57	124989	2.52217	2.47962	2.34625	2.3605
1553629_a_at	FAM71B	153745	4.346	4.503	4.4466	4.42068
1553630_at	C10orf107	219621	2.2756	2.16833	2.43355	2.20868
1553633_s_at	NHEDC1	150159	3.105	3.04793	3.1177	3.1006
1553634_a_at	FLJ40852	285962	3.13358	3.23867	3.39288	3.39808
1553635_s_at	TCTEX1D1	200132	4.85227	5.03463	4.37157	4.5919
1553636_at	TMCO5A	145942	2.43533	2.37803	2.30737	2.21485
1553637_s_at	TMCO5A	145942	4.0356	3.85503	3.97917	4.01237
1553639_a_at	PPARGC1B	133522	4.49025	4.22952	4.76675	4.63893
1553640_at	XKR6	286046	4.44025	4.53193	4.49198	4.5454
1553641_a_at	TSGA13	114960	3.03903	3.1915	3.07203	3.03708
1553642_at	C9orf163	158055	5.90268	5.93693	5.6223	5.71957
1553644_at	C14orf49	161176	3.47613	3.4407	3.535	3.46543
1553645_at	CCDC141	285025	1.95388	2.08115	2.0586	2.00025
1553646_at	HDX	139324	5.7009	5.67125	5.46315	5.20557
1553647_at	CDYL2	124359	5.7454	5.64168	5.5648	5.4917
1553651_at	C18orf54	162681	2.76072	2.71212	3.49782	3.50085
1553652_a_at	C18orf54	162681	3.19165	3.12665	5.30767	5.38435
1553654_at	SYT14	255928	3.2682	3.0079	3.25965	2.88017
1553655_at	CDC20B	166979	3.02468	2.8627	2.87697	2.88545
1553656_at	TECTB	6975	4.59108	4.68222	4.51055	4.54882
1553657_at	VWA3A	146177	4.60548	4.61988	4.27482	4.19648
1553658_at	LOC150197	150197	4.65658	4.59135	4.43372	4.48505
1553660_at	HUS1B	135458	3.86645	3.9073	3.94545	3.89668
1553661_a_at	HUS1B	135458	2.54008	2.5797	2.70965	2.76165
1553663_a_at	NPB	256933	5.79703	5.76695	5.43985	5.64645
1553666_at	CCDC34	91057	2.54732	2.57607	3.087	2.97375
1553668_at	LRCH3	84859	4.71645	4.60947	4.54785	4.6803
1553670_at	INTS4	92105	3.1941	3.25237	3.33265	3.20333
1553672_at	ENAH	55740	5.16425	5.42988	5.70395	5.67705
1553673_at	STK35	140901	3.5711	3.57498	3.7793	3.57428
1553674_at	LRRIQ3	127255	2.48385	2.74055	2.58225	2.5396
1553675_at	KLC4	89953	4.1032	3.95877	3.70693	3.9884
1553677_a_at	TIPRL	261726	8.0995	8.10138	8.6348	8.6781
1553678_a_at	ITGB1	3688	11.6737	11.7113	11.2947	11.3183
1553679_s_at	VKORC1L1	154807	3.9883	4.1965	4.56278	4.57895
1553681_a_at	PRF1	5551	5.49073	5.4064	5.33047	5.19177
1553682_at	FBXL14	144699	3.44895	3.3736	3.39613	3.54192
1553683_s_at	FBXL14	144699	2.88587	2.96202	3.0928	3.23775
1553684_at	PPIL6	285755	2.54948	2.52557	2.40558	2.36455
1553685_s_at	SP1	6667	4.3043	4.49907	5.10478	5.2058
1553686_at	C18orf25	147339	4.2993	4.33215	4.67303	4.74142
1553688_at	METTL6	131965	5.02695	4.95732	4.93487	4.90862
1553689_s_at	METTL6	131965	6.97175	6.98405	7.0048	6.92753
1553690_at	SGOL1	151648	4.90367	4.54797	5.85325	6.03915
1553691_at	B3GALNT2	148789	2.9393	3.03655	3.0869	3.12832
1553693_s_at	CBR4	84869	5.9595	5.72607	4.86073	4.63635
1553694_a_at	PIK3C2A	5286	6.69773	6.67618	6.7066	6.57468
1553695_a_at	NLRX1	79671	5.7149	5.49108	5.7759	5.74735
1553696_s_at	ZNF569	148266	5.16542	5.2469	5.6526	5.66212
1553697_at	C1orf96	126731	2.24257	2.5063	2.41043	2.3923
1553698_a_at	C1orf96	126731	2.47142	2.58608	2.8883	2.61845
1553701_a_at	DUSP18	150290	5.81555	5.8569	5.50015	5.35345
1553702_at	ZNF697	90874	4.4466	4.57537	4.43205	4.32452
1553703_at	ZNF791	163049	8.80673	8.78225	8.44652	8.523
1553704_x_at	ZNF791	163049	8.59718	8.59357	8.2576	8.36625
1553705_a_at	CHRM3	1131	3.24795	3.16968	3.0983	3.21997
1553706_at	HTRA4	203100	3.12853	3.11247	3.52268	3.66728
1553708_at	MGC16075	84847	2.11892	2.30945	2.26895	2.4972
1553709_a_at	PRPF38A	84950	8.02735	8.10905	8.4024	8.52072
1553710_at	C4orf39	152756	2.0188	2.06375	2.0611	1.93192
1553711_a_at	C4orf39	152756	2.84018	2.8034	2.6313	2.60915
1553713_a_at	RHEBL1	121268	5.20418	5.21495	7.85125	7.88847
1553715_s_at	FAM195A	84331	7.471	7.47138	7.12853	7.07992
1553717_at	KCTD7	154881	4.25655	4.20128	4.1883	4.11862
1553718_at	ZNF548	147694	6.15285	6.1966	5.86397	6.0367
1553719_s_at	ZNF548	147694	4.71968	4.74575	4.70017	4.82125
1553720_a_at	FAM123A	219287	5.0999	5.2764	4.99075	5.01165
1553721_at	RNF152	220441	2.29905	2.1745	2.31733	2.14775
1553722_s_at	RNF152	220441	2.58145	2.7238	2.58137	2.69782
1553723_at	GPR97	222487	2.83603	2.8315	2.63377	2.8325
1553725_s_at	ZNF644	84146	4.73855	4.86453	5.21543	5.0549
1553726_s_at	C6orf170	221322	3.59505	3.2862	3.98583	3.6402
1553727_at	B4GALNT3	283358	4.91672	4.87412	4.72218	4.65752
1553728_at	LRRC43	254050	7.64748	7.7596	7.90963	7.75192
1553729_s_at	LRRC43	254050	3.4835	3.44678	3.31005	3.32527
1553730_x_at	LRRC43	254050	6.0921	6.0243	6.13063	6.10457
1553732_s_at	CCDC123	84902	6.36475	6.317	6.1463	6.191
1553734_at	AK7	122481	2.64153	2.61158	2.55703	2.46582
1553736_at	ZFC3H1	196441	2.36198	2.44532	2.7922	2.78483
1553739_at	IRAK2	3656	2.28078	2.2699	2.33507	2.37562
1553740_a_at	IRAK2	3656	3.33998	3.4628	3.46522	3.49415
1553741_at	C1orf211	148645	2.34658	2.43237	2.41033	2.40947
1553743_at	FAM119A	151194	5.03193	5.0471	7.0277	6.92425
1553746_a_at	C12orf64	283310	4.41423	4.58397	2.83117	2.82755
1553747_at	MGC16025	85009	2.53392	2.5494	2.64785	2.56197
1553749_at	FAM76B	143684	5.05852	5.07625	5.2529	5.3439
1553750_a_at	FAM76B	143684	4.42438	4.21167	4.92665	4.66352
1553752_at	C20orf165	128497	4.05115	4.15525	4.05188	4.14668
1553755_at	NXNL1	115861	6.2161	6.23027	6.08608	5.97368
1553756_at	C9orf70	84850	4.1016	4.02653	3.7294	3.8235
1553757_at	IQCG	84223	3.04798	3.05285	3.00475	3.06392
1553759_at	MCM9	254394	2.87033	2.7736	2.88433	3.01265
1553761_at	C22orf30	253143	3.717	3.8612	3.75652	3.7575
1553764_a_at	JUB	84962	8.5274	8.4023	8.42328	8.65585
1553765_a_at	KLHL32	114792	1.9382	1.90362	2.00645	2.01713
1553768_a_at	DCBLD1	285761	8.5134	8.48072	7.82747	7.58033
1553769_at	SLAMF9	89886	4.4898	4.6235	4.71793	4.72065
1553770_a_at	SLAMF9	89886	4.55345	4.57012	4.50715	4.57797
1553772_at	GK5	256356	2.98067	2.9594	3.24025	3.38605
1553775_at	FLJ31715	152048	3.86762	3.811	3.63185	3.51412
1553776_at	UBE2U	148581	2.29327	2.16445	2.20047	2.3002
1553778_at	WBSCR27	155368	5.62145	5.51372	5.68625	5.69625
1553780_at	MGC23270	196872	5.22872	5.21203	4.92608	5.00967
1553781_at	ZC3HAV1L	92092	2.29405	2.22825	2.18938	2.20993
1553785_at	RASGEF1B	153020	2.46195	2.4538	2.42445	2.35115
1553787_at	C11orf45	219833	3.3379	3.30732	2.8221	2.92148
1553789_a_at	C21orf58	54058	4.21085	4.12665	5.39542	5.59505
1553792_at	KIAA1109	84162	2.00523	2.03887	2.05262	2.02307
1553793_a_at	KIAA1109	84162	2.79462	2.6562	2.59497	2.64308
1553794_at	STOML3	161003	3.19247	3.15808	3.24763	3.19945
1553796_at	LOC150622	150622	3.47118	3.50822	3.50637	3.63195
1553797_a_at	LOC150622	150622	2.40108	2.4503	2.31933	2.39158
1553798_a_at	FBXL13	222235	6.58022	6.48445	2.88478	2.90653
1553799_at	C15orf33	196951	2.4408	2.3388	2.21663	2.3891
1553801_a_at	C14orf126	112487	3.95783	4.05575	4.0375	4.03845
1553802_a_at	SOX3	6658	4.8273	4.74345	4.33775	4.35575
1553803_at	C17orf46	124783	6.38	6.3889	6.11945	6.14823
1553804_a_at	C17orf46	124783	2.6721	2.6996	2.484	2.51455
1553805_at	C3orf49	132200	4.17227	3.9652	3.82158	4.01985
1553808_a_at	NKX2-3	159296	2.2955	2.3157	2.21935	2.29205
1553809_a_at	C9orf71	169693	3.18053	3.12593	2.9212	3.02162
1553810_a_at	KIAA1524	57650	4.8819	4.7785	6.655	6.7133
1553811_at	MGC14436	84983	2.65273	2.86205	2.6905	2.79705
1553812_at	TLE6	79816	3.94535	4.06128	4.12673	4.1048
1553813_s_at	TLE6	79816	3.93695	4.28685	4.12722	4.1196
1553815_a_at	TCEANC	170082	4.24092	4.2243	4.0526	4.15123
1553817_at	NA	NA	3.86063	4.10958	3.75298	3.92263
1553818_x_at	NA	NA	4.0236	4.09202	4.02655	3.95875
1553821_at	C12orf51	283450	3.10697	3.10128	3.0341	3.1028
1553822_at	RTP1	132112	2.42778	2.40853	2.35962	2.40555
1553823_a_at	RTP1	132112	2.50877	2.57222	2.5733	2.59295
1553826_a_at	C16orf11	146325	5.61442	5.58135	5.43183	5.50313
1553828_at	FAM55A	120400	3.01795	3.05055	3.05325	3.01912
1553829_at	C2orf58	285154	2.26848	2.20093	2.27077	2.0816
1553830_s_at	NA	NA	2.54685	2.38223	2.6439	2.60257
1553831_at	APOBEC3D	140564	3.76912	3.7548	3.76867	3.7245
1553832_at	C21orf93	246704	4.8375	4.80963	4.76978	4.80495
1553834_at	COL29A1	256076	2.24467	2.47642	2.3833	2.3628
1553835_a_at	COL29A1	256076	2.50448	2.5038	2.50095	2.65062
1553837_at	NA	NA	4.12948	4.06495	4.1142	4.1189
1553838_at	C4orf45	152940	2.92462	3.03048	3.06123	2.91043
1553839_at	CCDC149	91050	4.56837	4.44988	4.21267	4.4139
1553840_a_at	CCDC149	91050	5.315	5.45637	5.16667	5.16095
1553842_at	BEND2	139105	2.498	2.5615	2.4589	2.4962
1553843_at	C10orf67	256815	5.22253	5.1648	5.1005	5.16413
1553844_a_at	C10orf67	256815	3.49842	3.3654	3.33315	3.27578
1553845_x_at	C10orf67	256815	5.10208	5.2462	5.1176	5.16922
1553846_at	SPERT	220082	4.65478	4.66095	4.60433	4.44828
1553847_a_at	SPERT	220082	3.0762	2.9972	2.94847	3.01585
1553849_at	CCDC26	137196	2.45055	2.44977	2.32238	2.24
1553850_at	C21orf88	114041	2.746	2.84437	2.82062	2.82185
1553851_at	SPIC	121599	2.22377	2.2321	2.13528	2.26308
1553852_at	VPS13B	157680	2.9137	2.78	2.74903	3.01638
1553856_s_at	P2RY10	27334	3.07305	2.87805	2.9231	2.96055
1553857_at	IGSF22	283284	5.5182	5.55173	5.56637	5.40072
1553858_at	ZBTB3	79842	6.22255	6.12057	6.49575	6.43653
1553859_at	TPH1	7166	2.7001	2.8214	2.71433	2.67985
1553860_at	DCST1	149095	4.06015	3.98488	3.75707	4.01165
1553861_at	TCP11L2	255394	3.08688	3.12343	3.03202	2.92195
1553863_at	WDFY4	57705	2.96402	2.93078	3.05095	2.9825
1553864_at	GPR26	2849	2.64023	2.75925	2.6846	2.7394
1553865_a_at	GPR26	2849	3.71193	3.75888	3.30347	3.39245
1553868_a_at	C5orf36	285600	2.10062	2.10692	1.96608	2.1105
1553869_at	SESN3	143686	2.82177	2.62182	2.652	2.68607
1553871_at	C19orf34	255193	4.7735	4.78042	4.53685	4.73123
1553872_at	C17orf103	256302	5.32627	5.41335	5.21997	5.18647
1553873_at	KLHL34	257240	2.22425	2.28812	2.35177	2.21255
1553874_a_at	ZSCAN10	84891	4.4094	4.49913	4.58978	4.58682
1553875_s_at	ZSCAN10	84891	4.68792	4.5821	4.53735	4.56953
1553876_at	SAMD3	154075	2.45177	2.60922	2.75515	2.466
1553878_at	GOT1L1	137362	3.03357	2.88417	2.81117	2.92597
1553879_a_at	GOT1L1	137362	3.25803	3.22153	3.1819	3.1213
1553880_at	C10orf91	170393	3.9368	4.0009	4.3201	4.19118
1553881_at	MGC16142	84849	3.02945	2.97587	3.29673	3.19945
1553882_at	NA	NA	2.5531	2.62815	2.5379	2.61008
1553883_at	ZNF99	7652	2.0571	2.1483	2.24765	2.18933
1553885_x_at	ZNF99	7652	2.17845	2.13218	2.26578	2.19525
1553886_at	CCDC108	255101	2.33325	2.3141	2.30358	2.21765
1553887_at	C19orf75	284369	2.46162	2.67015	2.47407	2.7679
1553888_at	LDHAL6A	160287	3.2206	3.21055	3.24817	3.3002
1553889_at	MRGPRX2	117194	3.76885	3.7829	3.78245	3.6518
1553890_s_at	NTN5	126147	5.79883	5.7852	5.77897	5.73713
1553891_at	KLF17	128209	4.29162	4.52172	4.30767	4.24772
1553893_at	CCDC105	126402	4.8187	4.87363	4.59518	4.62405
1553894_at	CCDC122	160857	2.45473	2.47698	2.6772	2.56935
1553895_at	C11orf42	160298	4.1528	4.16732	3.96007	3.97037
1553898_a_at	DKFZp434L192	222029	2.38172	2.4295	2.385	2.3558
1553900_s_at	NA	NA	4.49493	4.28672	4.37858	4.44117
1553901_x_at	ZNF486	90649	2.99982	2.89317	3.20885	3.21705
1553905_at	CXorf22	170063	2.25725	2.4599	2.32957	2.2666
1553906_s_at	FGD2	221472	7.55272	7.64578	7.41325	7.40867
1553907_a_at	EXD1	161829	2.56022	2.51722	2.50875	2.51767
1553909_x_at	FAM178A	55719	5.5782	5.4533	5.72797	5.74105
1553910_at	NBPF4	148545	3.76697	3.77707	3.67025	3.75733
1553911_at	ZNF663	100130934	2.73997	2.77838	2.83545	2.64248
1553912_at	FLJ35424	285492	2.39177	2.64855	2.5642	2.54992
1553914_at	MGC34800	162137	3.66255	3.60135	3.25765	3.34158
1553915_at	C10orf126	283080	2.06575	2.0399	2.00242	2.11365
1553917_at	PIKFYVE	200576	4.62937	4.34462	4.3997	4.5024
1553918_at	C21orf129	150135	3.79985	3.8831	3.516	3.63425
1553919_at	C9orf62	157927	3.87627	3.8489	3.72995	3.7957
1553920_at	C9orf84	158401	2.142	2.22628	2.02458	2.19692
1553923_at	SLC22A24	283238	3.26012	3.2734	3.2698	3.23263
1553924_at	FMO9P	116123	2.60708	2.61742	2.42767	2.56427
1553927_at	C7orf33	202865	2.762	2.80387	2.68627	2.80265
1553928_at	ELMOD2	255520	5.8956	5.7942	5.4398	5.37913
1553929_at	ACER1	125981	4.18212	4.20565	4.22577	4.32227
1553930_at	TAAR1	134864	2.22152	2.21762	2.20622	2.25015
1553931_at	OSTCL	202459	2.68637	2.62233	2.5745	2.44607
1553934_at	C18orf20	221241	3.45768	3.29375	2.72435	2.62452
1553935_at	MGC2848	85003	2.5017	2.58795	2.5236	2.63103
1553936_a_at	MGC2848	85003	4.39088	4.2865	4.13322	4.254
1553938_a_at	STK32A	202374	2.4091	2.38788	2.3918	2.40385
1553940_a_at	LRRC28	123355	5.41425	5.36792	5.38562	5.20918
1553943_at	NS3BP	171391	5.36355	5.22562	5.26353	5.25052
1553944_at	MIA2	117153	2.45763	2.36137	2.2533	2.22027
1553945_at	GPHB5	122876	3.8201	3.89973	3.91932	4.00475
1553946_at	DCD	117159	3.9181	3.9628	3.88987	3.87357
1553947_at	EXOSC6	118460	6.30685	6.3463	6.8426	6.99357
1553949_at	IQSEC3	440073	3.50245	3.5333	3.63585	3.70273
1553952_at	ZDHHC19	131540	5.4821	5.45675	5.22692	5.27372
1553954_at	ALG14	199857	8.13045	8.16965	7.6459	7.76875
1553955_at	KLRAQ1	129285	8.32892	8.2081	8.27315	8.18308
1553956_at	ALS2CR4	65062	9.01993	9.01502	8.8646	8.95632
1553957_at	ZNF564	163050	6.30432	6.35752	6.43027	6.52195
1553959_a_at	B3GALT6	126792	9.17215	9.1564	8.37477	8.35592
1553960_at	SNX21	90203	6.55737	6.58882	5.84527	5.9781
1553961_s_at	SNX21	90203	6.31803	6.24477	6.07162	6.17893
1553962_s_at	RHOB	388	6.43452	6.41715	5.3514	5.54657
1553963_at	RHOB	388	2.162	2.15262	2.22752	2.2156
1553965_x_at	RHOB	388	2.6304	2.70495	2.26865	2.26493
1553967_at	NA	NA	4.64315	4.6717	4.78843	4.7228
1553968_a_at	NA	NA	6.7258	6.74245	6.77605	6.79
1553970_s_at	CEL	1056	3.82805	3.78292	3.59662	3.6165
1553971_a_at	GATS	352954	5.62273	5.62553	5.52028	5.47555
1553972_a_at	CBS	875	7.0835	7.08833	5.47785	5.8526
1553973_a_at	SPINK6	404203	3.8824	3.87488	3.80702	3.54165
1553974_at	NA	NA	6.87575	6.88998	7.89018	8.0624
1553976_a_at	DPCD	25911	8.63475	8.59783	8.07183	8.2006
1553977_a_at	CYP39A1	51302	4.3345	4.6281	4.29117	4.39848
1553978_at	LOC729991	729991	8.3401	8.3001	7.99545	7.89177
1553979_at	NA	NA	9.2107	9.2748	9.2444	9.26892
1553982_a_at	RAB7B	338382	4.1894	4.08525	3.82275	3.88085
1553983_at	DTYMK	1841	6.49033	6.30743	7.0146	7.18035
1553984_s_at	DTYMK	1841	9.12315	9.13495	10.2034	10.3556
1553986_at	RASEF	158158	3.29345	3.20605	3.20965	3.09645
1553987_at	C12orf47	51275	7.51565	7.581	7.46557	7.4918
1553989_a_at	ATP6V1C2	245973	3.7181	3.61902	3.52738	3.6728
1553990_at	C16orf79	283870	5.27035	5.39858	5.7654	5.976
1553991_s_at	VSIG10	54621	6.3098	6.2014	6.5174	6.6036
1553992_s_at	NBR2	10230	5.87615	5.89697	5.40222	5.49705
1553993_s_at	MED25	81857	8.4979	8.49385	8.9482	8.89503
1553994_at	NT5E	4907	7.40097	6.99817	8.2707	7.85695
1553995_a_at	NT5E	4907	6.67025	6.29775	7.55198	7.2323
1553997_a_at	ASPHD1	253982	5.9101	5.8339	6.20013	6.07667
1553998_at	NA	NA	3.69253	3.6422	3.58855	3.58605
1554001_at	TRIM37	4591	6.7231	6.5209	6.63157	6.46675
1554003_at	RGNEF	64283	7.15447	7.15083	7.8705	7.96138
1554004_a_at	RGNEF	64283	7.60315	7.54338	7.36463	7.24127
1554006_a_at	LLGL2	3993	4.8214	4.83108	4.6558	4.64115
1554007_at	NA	NA	4.1163	4.11695	3.38518	3.3548
1554008_at	OSMR	9180	5.99603	6.0268	7.4308	7.59115
1554010_at	NDST1	3340	6.29067	6.399	6.2179	6.28812
1554012_at	RSPO2	340419	2.17388	2.2945	2.23068	2.22975
1554014_at	CHD2	1106	6.91838	6.8867	6.91245	6.76895
1554015_a_at	CHD2	1106	6.65825	6.5985	6.5618	6.48592
1554016_a_at	C16orf57	79650	7.68145	7.6067	7.30545	7.37157
1554017_at	RILPL1	353116	5.02088	4.94755	4.7413	4.65555
1554018_at	GPNMB	10457	2.22737	2.2389	2.26107	2.36282
1554019_s_at	C6orf182	285753	4.27225	4.352	5.7063	5.59425
1554020_at	BICD1	636	5.57207	5.61233	6.67737	6.77978
1554021_a_at	ZNF12	7559	7.54045	7.52173	7.5221	7.60745
1554022_at	CCDC13	152206	2.70855	2.60395	2.61965	2.61945
1554023_s_at	CCDC13	152206	4.79603	5.01387	4.71635	4.72497
1554026_a_at	MYO10	4651	6.05453	6.12093	5.90233	5.76628
1554027_a_at	SLC4A4	8671	2.54833	2.48947	2.34858	2.4108
1554029_a_at	TTC37	9652	4.95025	4.73128	4.96267	4.8588
1554030_at	ARSB	411	4.87807	4.92737	4.96445	5.1844
1554032_at	ARSB	411	2.66427	2.7355	2.68145	2.67535
1554033_at	FRMD4A	55691	3.0848	2.99728	2.90045	2.98463
1554034_a_at	FRMD4A	55691	2.72975	2.8395	2.94772	2.82282
1554036_at	ZBTB24	9841	4.92265	4.9303	5.57592	5.42593
1554037_a_at	ZBTB24	9841	4.11215	4.02632	4.6592	4.653
1554038_at	LARP1B	55132	5.07575	4.93805	4.6912	4.5967
1554039_at	C14orf159	80017	5.49083	5.4059	5.66657	5.59327
1554041_at	NA	NA	3.46367	3.35158	3.28335	3.28
1554042_s_at	NA	NA	5.32115	5.31618	5.29157	5.3445
1554043_a_at	NA	NA	3.94307	4.04165	4.31285	4.33575
1554044_a_at	MRAP	56246	3.87165	3.83177	3.94632	3.81193
1554045_at	ZNF24	7572	3.9135	3.94015	3.94087	3.8692
1554047_at	TXNDC9	10190	5.6233	5.61895	6.10005	6.0346
1554049_s_at	DCAF8	50717	5.03627	5.18315	4.3665	4.58795
1554050_at	SMPDL3B	27293	5.0385	4.96148	4.9139	4.97207
1554052_at	CNOT1	23019	5.2872	5.38492	6.0396	5.72613
1554053_at	SPTLC1	10558	5.58458	5.5212	6.3767	6.29005
1554057_at	LOC645676	645676	5.1377	5.0357	6.03432	5.98953
1554059_at	SETMAR	6419	4.52935	4.57945	4.28625	4.34815
1554060_s_at	SETMAR	6419	3.0695	3.02842	2.9847	3.1631
1554062_at	XG	7499	3.071	2.996	2.80365	2.8597
1554063_at	C8orf76	84933	5.08553	5.17135	5.72685	5.5648
1554065_at	FAM125B	89853	5.17972	5.17977	5.18175	5.2417
1554067_at	C12orf66	144577	4.41733	4.39665	4.77645	4.78852
1554068_s_at	C12orf66	144577	3.88055	3.84285	4.26512	4.15937
1554069_at	EPHA8	2046	4.012	4.11585	4.1264	3.95465
1554071_at	CCDC67	159989	2.12758	2.12058	2.0929	2.11397
1554072_s_at	CCDC67	159989	1.9119	1.89058	1.94138	1.874
1554074_s_at	SLFNL1	200172	5.18382	5.1001	4.86575	5.03245
1554076_s_at	TMEM136	219902	6.71045	6.70073	6.55245	6.57535
1554077_a_at	TMEM53	79639	4.82862	4.95425	5.31693	5.31595
1554078_s_at	DNAJA3	9093	8.8629	8.87235	9.42822	9.43195
1554079_at	GALNTL4	374378	4.639	4.60102	4.6375	4.56612
1554080_at	RQCD1	9125	6.9089	6.83023	7.12197	7.03448
1554082_a_at	NOL9	79707	7.01768	7.0412	7.47045	7.54945
1554084_a_at	NOL9	79707	7.0756	7.14265	7.44575	7.40838
1554085_at	DDX51	317781	6.54138	6.49333	6.5638	6.55462
1554086_at	TUBGCP3	10426	3.71795	3.6387	4.20595	4.26035
1554089_s_at	NA	NA	9.479	9.3809	9.67025	9.58345
1554091_a_at	TIRAP	114609	5.63165	5.6658	5.4222	5.47805
1554093_a_at	SNAPC5	10302	7.86517	7.75845	8.09783	8.07015
1554094_at	ENTPD5	957	4.58933	4.55227	4.66807	4.65367
1554095_at	RBM33	155435	5.00505	4.91532	5.6504	5.31568
1554096_a_at	RBM33	155435	3.66372	3.6782	4.106	3.9738
1554097_a_at	LOC554202	554202	5.95397	5.97778	5.91835	5.69145
1554098_at	SPIN3	169981	4.64635	4.60935	4.49568	4.4412
1554099_a_at	SPIN3	169981	4.97488	4.8965	4.53927	4.63333
1554101_a_at	TMTC4	84899	6.05197	6.09028	5.9783	6.0051
1554102_a_at	TMTC4	84899	6.03855	6.01077	5.91855	5.96515
1554103_at	NA	NA	4.89522	4.83727	4.89605	4.76393
1554105_at	TMEM185A	84548	6.06185	6.05438	5.52707	5.51817
1554106_at	NBEAL1	65065	5.2139	4.8903	5.48595	5.58323
1554108_at	NA	NA	2.64803	2.65035	2.45498	2.4412
1554110_at	CDCP1	64866	3.79482	3.7099	3.57883	3.611
1554112_a_at	ULK2	9706	5.05005	5.11445	5.0045	5.06668
1554113_a_at	SLC4A8	9498	4.11428	4.12007	3.79447	4.0661
1554114_s_at	SSH2	85464	4.2082	3.93975	4.1221	4.11698
1554115_at	C5orf58	133874	3.58245	3.61835	3.4365	3.47932
1554116_s_at	PARP11	57097	3.66715	3.67245	3.7135	3.84395
1554117_at	CCDC60	160777	4.96967	5.07353	4.85335	4.90853
1554119_at	C16orf57	79650	3.59465	3.58025	3.59638	3.72093
1554121_at	HSD17B12	51144	2.98897	3.2095	2.8825	2.81005
1554122_a_at	HSD17B12	51144	4.70203	4.66317	3.68053	3.86083
1554125_a_at	NLGN4Y	22829	3.30005	3.03938	2.49228	2.52157
1554126_at	MSRB3	253827	8.09445	8.06688	8.15462	8.05435
1554127_s_at	MSRB3	253827	8.15538	8.0353	8.18153	8.08248
1554128_at	ADIG	149685	5.36605	5.4404	5.26513	5.25488
1554129_a_at	ADIG	149685	4.24675	4.38572	4.18628	4.22357
1554131_at	FAM190B	54462	2.1118	2.19705	2.27778	2.28902
1554132_a_at	FAM190B	54462	6.89497	6.72232	7.3889	7.21583
1554133_at	RUFY2	55680	2.30357	2.24395	2.33485	2.18628
1554140_at	WDR78	79819	3.31063	3.50315	2.82832	2.66213
1554141_s_at	WDR78	79819	3.06787	2.95863	2.66193	2.80725
1554142_at	SUGT1L1	283507	2.1078	2.04108	2.05275	2.0707
1554143_a_at	SUGT1L1	283507	2.56635	2.73342	2.83003	2.6329
1554145_a_at	KLRAQ1	129285	5.38432	5.65382	5.54212	5.62288
1554147_s_at	C3orf15	89876	2.94762	2.91887	2.96558	2.9416
1554148_a_at	SLC33A1	9197	7.28317	7.26642	6.91118	6.8446
1554149_at	CLDND1	56650	8.89257	8.9043	8.9649	9.09
1554151_at	OGDH	4967	5.34685	5.20878	5.44738	5.37015
1554152_a_at	OGDH	4967	3.88413	3.89463	4.17935	4.15075
1554153_a_at	PHF21A	51317	6.53137	6.5355	6.17635	6.1483
1554154_at	GDAP2	54834	5.07548	5.0163	5.37705	5.32772
1554155_at	MCPH1	79648	5.856	5.9942	7.12147	7.05015
1554156_a_at	WFDC8	90199	3.28725	3.16383	3.1867	3.27933
1554157_a_at	WFDC8	90199	3.7352	3.82295	3.81925	3.68525
1554158_at	ZMYND11	10771	4.42652	4.56155	4.27775	4.1927
1554159_a_at	ZMYND11	10771	5.0168	4.94398	4.7452	4.66335
1554160_a_at	ZNF446	55663	6.20955	6.05495	5.9468	6.01305
1554161_at	SLC25A27	9481	2.5939	2.44728	2.29337	2.3463
1554163_at	TWIST2	117581	3.98685	3.84765	3.56235	3.73963
1554165_at	FAM53B	9679	2.5805	2.78405	2.745	2.67452
1554167_a_at	GOLGA7	51125	8.43938	8.50272	8.67435	8.64947
1554168_a_at	SH3KBP1	30011	8.92093	8.87442	9.61092	9.58788
1554170_a_at	MBLAC1	255374	5.9997	6.06075	5.8728	5.8692
1554171_at	ZMYM3	9203	6.32465	6.28083	6.312	6.39813
1554172_a_at	ZMYM3	9203	5.78812	5.78152	5.84393	5.8155
1554173_at	CD300LB	124599	5.0425	5.00025	4.67108	4.91995
1554175_at	CD300LB	124599	5.15618	5.0959	5.18483	5.19915
1554176_a_at	C3orf33	285315	2.88135	2.8753	2.65367	2.76648
1554177_a_at	ATP5S	27109	7.17045	7.23625	7.40175	7.44928
1554178_a_at	FAM126B	285172	6.82987	6.67323	7.48518	7.33365
1554179_s_at	LYNX1	66004	5.67128	5.6441	5.39692	5.49837
1554181_at	SNX32	254122	3.62988	3.90975	3.59975	3.722
1554182_at	NA	NA	3.44985	3.47297	3.53688	3.55265
1554183_s_at	NA	NA	5.8905	5.90653	5.71237	5.83565
1554185_at	LOC554206	554206	3.82185	3.6832	4.33522	4.10605
1554187_at	LOC554206	554206	2.59875	2.45312	2.69112	2.57273
1554188_at	C11orf53	341032	5.3173	5.2796	5.1865	5.27192
1554190_s_at	C10orf81	79949	2.24325	2.25355	2.2102	2.24075
1554192_s_at	C4orf23	152992	6.23445	6.275	5.9684	6.01487
1554193_s_at	MANEA	79694	4.33688	4.45738	4.99905	4.9946
1554194_at	LOC100287037	100287037	3.3438	3.53955	3.57952	3.40212
1554195_a_at	C5orf46	389336	4.3077	4.5386	8.97152	9.42952
1554196_at	IZUMO1	284359	2.7043	2.67915	2.61003	2.71747
1554198_at	SH3YL1	26751	4.05928	4.07822	4.11477	3.98482
1554199_at	PTPRO	5800	2.70622	2.66865	2.7432	2.65705
1554201_at	CABP4	57010	5.70805	5.66835	6.17678	5.93815
1554202_x_at	CABP4	57010	5.88693	5.62882	6.15	6.0519
1554203_at	NCRNA00110	642976	2.65925	2.76302	2.68998	2.84782
1554205_s_at	ICA1L	130026	4.35107	4.24205	4.35197	4.4167
1554206_at	TMLHE	55217	5.09492	5.34762	4.79627	4.9086
1554208_at	MEI1	150365	5.3386	5.29615	5.23177	5.29665
1554210_at	ZCCHC13	389874	3.37163	3.4224	3.40245	3.39818
1554212_s_at	KCNS2	3788	3.91325	3.9577	3.72587	3.95465
1554213_at	ARHGEF10	9639	6.14433	6.00982	5.95787	6.05917
1554214_at	NA	NA	3.28915	3.26135	3.1928	3.28423
1554216_at	CCDC132	55610	2.67005	2.79712	3.3942	3.3124
1554217_a_at	CCDC132	55610	4.33697	4.47947	5.39735	5.09925
1554219_at	NA	NA	5.4169	5.48302	5.1996	5.1842
1554220_a_at	NA	NA	2.65733	2.73075	2.86322	2.78893
1554222_at	MGC45922	284365	4.94202	4.76312	4.52717	4.58367
1554224_at	NA	NA	2.44833	2.45765	2.5404	2.58427
1554225_a_at	NA	NA	2.23885	2.1504	2.26755	2.22285
1554228_a_at	C8orf56	157556	4.31312	4.41292	4.2889	4.37247
1554229_at	C5orf41	153222	3.98465	4.01817	4.851	4.67645
1554231_a_at	ZNF396	252884	5.21443	5.2453	4.9762	5.0445
1554232_a_at	NA	NA	2.59348	2.5629	2.49923	2.52505
1554233_at	C1QTNF9	338872	2.405	2.39617	2.32685	2.3556
1554234_at	KATNAL2	83473	2.95975	2.87338	2.76107	2.77473
1554235_at	CTNNA3	29119	2.37565	2.25275	2.36305	2.32655
1554237_at	SDCCAG8	10806	4.19262	4.13915	4.29375	4.29772
1554239_s_at	ZADH2	284273	7.23445	7.21955	7.60592	7.54305
1554240_a_at	ITGAL	3683	2.3039	2.23018	2.20043	2.21387
1554241_at	COCH	1690	7.24718	7.2528	7.28055	7.2375
1554242_a_at	COCH	1690	3.00592	2.9521	3.32355	3.54183
1554245_x_at	NA	NA	6.62635	6.7459	6.5737	6.66798
1554246_at	C1orf210	149466	2.50727	2.6162	2.48308	2.3788
1554248_at	ZNF638	27332	5.3121	5.58422	5.5112	5.5472
1554249_a_at	ZNF638	27332	6.1436	6.10545	6.29753	6.32733
1554250_s_at	TRIM73	375593	6.06073	5.985	5.92662	6.04803
1554251_at	HP1BP3	50809	7.26238	7.2313	7.9294	7.91035
1554252_a_at	LASS3	204219	2.37462	2.4183	2.284	2.4581
1554253_a_at	LASS3	204219	4.58212	4.60083	4.27217	4.21303
1554256_a_at	PCNXL2	80003	4.89653	5.1612	3.35885	3.62823
1554258_a_at	DNAJC5B	85479	3.994	3.7714	3.62355	3.70247
1554259_at	GPSM1	26086	4.69905	4.6743	4.5821	4.5427
1554260_a_at	FRYL	285527	7.13315	7.19755	7.0198	7.02427
1554261_at	KLHL29	114818	3.6067	3.63917	3.73517	3.68063
1554262_s_at	KLHL29	114818	5.13342	5.30875	4.72242	4.52822
1554264_at	CKAP2	26586	3.53733	3.64142	4.90445	4.9102
1554266_at	NA	NA	4.2356	4.16543	4.01877	3.94065
1554268_at	MORN1	79906	3.87175	3.87922	4.02725	3.76102
1554271_a_at	CENPL	91687	6.35428	6.19953	8.05348	8.09897
1554272_at	ERAP2	64167	2.2147	2.24843	2.742	2.5903
1554273_a_at	ERAP2	64167	3.78123	4.15937	4.80673	4.53558
1554274_a_at	SSH1	54434	4.51253	4.52853	4.47405	4.37467
1554276_at	SART3	9733	2.91133	2.77907	2.9613	2.83468
1554277_s_at	FANCM	57697	3.58405	3.58087	5.1374	5.0242
1554279_a_at	TRMT2B	79979	5.00772	4.98205	5.2124	5.02975
1554280_a_at	C9orf43	257169	3.2316	3.2848	3.11267	3.27272
1554281_at	NA	NA	1.97273	2.02113	2.07185	2.0435
1554283_at	CCRN4L	25819	5.7582	5.79345	5.25985	5.17158
1554285_at	HAVCR2	84868	4.0028	4.09835	4.03048	4.18205
1554286_at	FLJ25758	497049	4.84625	4.82375	4.87335	4.98393
1554287_at	TRIM4	89122	6.50237	6.40265	7.0015	7.01692
1554288_at	FAM160B1	57700	2.96258	2.95857	2.85982	2.9492
1554290_at	HERC3	8916	2.86947	2.74792	2.91757	3.05842
1554291_at	UHRF1BP1L	23074	3.57863	3.60708	3.89918	3.7797
1554292_a_at	UHRF1BP1L	23074	3.52585	3.58082	3.92632	3.95817
1554293_at	TTBK2	146057	2.4341	2.3907	2.61762	2.53927
1554294_s_at	TTBK2	146057	3.423	3.4546	3.63338	3.6577
1554295_x_at	TTBK2	146057	3.58628	3.70348	3.7437	3.7141
1554296_at	CYP19A1	1588	1.99195	2.0801	1.97693	2.0564
1554298_a_at	WDR49	151790	1.97792	1.90153	1.85882	1.95938
1554299_at	NPAS4	266743	3.1404	3.12835	3.06962	3.103
1554300_a_at	SVOPL	136306	2.8523	2.78668	2.51748	2.57705
1554301_at	LOC645591	645591	2.57798	2.4052	2.52407	2.49115
1554302_s_at	LOC645591	645591	2.7013	2.69275	2.6262	2.56968
1554303_at	HNMT	3176	4.22178	4.4612	4.06795	4.11607
1554305_at	MGC20647	91370	3.89085	3.86185	3.91575	3.86338
1554306_at	ITPKB	3707	3.17903	3.25985	3.32168	3.29283
1554307_at	LOC644852	644852	2.52303	2.49482	2.41017	2.44365
1554308_s_at	GABRA2	2555	2.60262	2.39732	2.54688	2.41038
1554309_at	EIF4G3	8672	2.9247	2.70945	3.1089	3.21645
1554310_a_at	EIF4G3	8672	4.72242	4.68973	4.64203	4.96283
1554311_a_at	SUPT6H	6830	2.5776	2.58327	2.49255	2.56295
1554312_at	RNF170	81790	4.51045	4.45277	4.41568	4.48663
1554314_at	C6orf141	135398	3.87108	3.67077	3.46825	3.4981
1554316_at	PGLS	25796	6.17773	5.96735	5.90462	5.91718
1554317_s_at	TRMT61A	115708	5.8381	5.87195	5.5049	5.65407
1554318_at	LOC541473	541473	3.38215	3.49758	3.2912	3.14728
1554319_at	RPS6KA5	9252	2.18867	2.07615	2.2072	2.04078
1554321_a_at	NA	NA	4.1716	4.36348	4.83882	4.7001
1554322_a_at	HDAC4	9759	3.82682	3.90638	3.99693	4.112
1554324_s_at	DYNC2LI1	51626	3.16697	3.1046	2.9616	2.78673
1554325_at	DOCK2	1794	2.77787	2.72103	2.8271	2.85522
1554327_a_at	CANT1	124583	5.33857	5.33368	5.3789	5.38175
1554328_at	STXBP4	252983	2.62383	2.50047	2.93743	2.7005
1554329_x_at	STXBP4	252983	2.927	2.91352	3.2325	3.29825
1554331_a_at	LRRC18	474354	3.64573	3.68098	3.64423	3.61172
1554332_a_at	hCG_2018279	100127888	4.29453	4.30938	4.19473	4.1567
1554333_at	DNAJA4	55466	2.79895	2.68953	3.25897	3.11082
1554334_a_at	DNAJA4	55466	5.91043	5.9473	6.32105	6.15913
1554335_at	CYTH4	27128	3.56102	3.5655	3.58587	3.56165
1554337_at	FARP2	9855	3.0644	3.09615	3.17178	3.17083
1554339_a_at	COG3	83548	2.8125	2.91922	2.83688	2.75692
1554340_a_at	C1orf187	374946	3.2497	3.09835	2.52987	2.53592
1554341_a_at	HELQ	113510	6.32962	6.21833	6.2617	6.20153
1554342_s_at	HELQ	113510	6.8531	6.80415	6.78673	6.73592
1554343_a_at	STAP1	26228	2.46145	2.53845	2.48877	2.4796
1554344_s_at	NA	NA	6.94125	6.97673	6.7854	6.75915
1554345_a_at	GIN1	54826	5.68615	5.55622	6.0315	5.92167
1554346_at	GNB5	10681	4.7223	4.6518	4.835	4.83742
1554348_s_at	CDKN2AIPNL	91368	4.2151	4.2786	4.84572	4.93447
1554349_at	XRCC6BP1	91419	3.33175	3.4491	3.28593	3.32835
1554351_a_at	TIPRL	261726	8.75977	8.73515	8.59522	8.5378
1554352_s_at	DENND4A	10260	7.2731	7.21825	7.45545	7.38112
1554354_at	SIAE	54414	1.99035	2.04232	2.04258	2.0151
1554355_a_at	SIAE	54414	3.13362	3.22375	2.97942	3.22193
1554356_at	GINS4	84296	3.77105	3.8396	5.19533	5.09725
1554360_at	FCHSD2	9873	5.21868	5.24895	4.77688	4.7393
1554362_at	BTG4	54766	2.12677	2.22205	2.03417	2.16933
1554364_at	PPP2R5C	5527	3.29965	3.23937	3.06682	3.12585
1554365_a_at	PPP2R5C	5527	8.30347	8.32147	7.54188	7.55247
1554367_at	CALHM1	255022	4.4144	4.6148	4.51235	4.4906
1554368_at	NT5C1B	93034	2.1944	2.17192	2.3154	2.2658
1554371_at	PKD1L2	114780	3.2789	3.26883	3.25323	3.23153
1554372_at	NA	NA	3.5123	3.35347	3.29935	3.409
1554374_at	NA	NA	3.35313	3.3983	3.1817	3.19093
1554375_a_at	NR1H4	9971	3.0622	2.94715	2.87247	2.9472
1554376_s_at	PTPLA	9200	4.93262	4.94082	5.08713	5.10578
1554377_a_at	CNTNAP4	85445	3.61285	3.79863	3.77097	3.63515
1554378_a_at	PDE1C	5137	2.83755	2.95808	3.0118	2.9431
1554379_a_at	TP73	7161	4.9065	4.91145	5.02152	4.88002
1554380_at	NEK11	79858	3.7752	3.7596	3.82722	3.64135
1554382_at	LOC200261	200261	5.05157	4.9909	4.8612	4.8161
1554383_a_at	TRAM2	9697	5.09745	5.15592	5.18805	5.14495
1554384_at	PADI2	11240	2.1494	2.21215	2.2271	2.2738
1554385_a_at	PADI2	11240	3.92727	4.07637	3.84198	3.75815
1554386_at	CST9	128822	4.40505	4.41045	4.48435	4.46535
1554388_at	VPS29	51699	4.5716	4.61953	4.75473	4.656
1554390_s_at	ACTR2	10097	7.89527	7.84288	7.5883	7.63983
1554391_at	TBK1	29110	5.23232	5.23838	5.06818	5.1822
1554393_a_at	ADC	113451	4.37352	4.34655	4.19875	4.35032
1554394_at	NELL1	4745	3.03838	3.24428	3.05035	3.1076
1554396_at	UEVLD	55293	5.52563	5.65262	5.32803	5.2711
1554397_s_at	UEVLD	55293	5.98205	5.99432	5.90452	5.85567
1554398_at	LYG2	254773	3.54345	3.62037	3.60555	3.54197
1554400_at	TCTE3	6991	2.72215	2.8426	2.67868	2.67482
1554401_a_at	TCTE3	6991	3.49238	3.2915	3.4216	3.35252
1554403_a_at	NA	NA	2.38178	2.47205	2.6214	2.46435
1554404_a_at	NA	NA	4.26765	4.49905	4.47637	4.2468
1554405_a_at	NCRNA00161	118421	2.3274	2.26325	2.45598	2.4138
1554406_a_at	CLEC7A	64581	4.19738	4.18968	4.20835	4.2968
1554408_a_at	TK1	7083	7.7892	7.95303	9.98713	10.1416
1554409_at	WBSCR16	81554	3.62645	3.59978	3.56053	3.74
1554410_a_at	WBSCR16	81554	6.55233	6.5412	6.43412	6.4739
1554411_at	CTNNB1	1499	8.54765	8.52075	7.8212	7.89458
1554413_s_at	NA	NA	2.6939	2.63152	2.62985	2.5992
1554414_a_at	OSGIN2	734	8.3366	8.37967	7.131	7.2217
1554415_at	TAF5L	27097	6.58345	6.79922	7.37007	7.26025
1554417_s_at	APH1A	51107	7.24958	7.17533	6.97002	6.9892
1554418_s_at	SPOCK3	50859	3.1653	3.2487	2.24587	2.24392
1554419_x_at	GGNBP2	79893	2.8403	2.72115	2.56208	2.51835
1554420_at	ATF3	467	4.26635	4.304	4.11533	4.28905
1554423_a_at	FBXO7	25793	9.39203	9.38945	9.5411	9.48155
1554424_at	FIP1L1	81608	4.5376	4.51067	5.05267	4.8673
1554428_s_at	NLGN2	57555	5.7971	5.68973	5.34117	5.54455
1554429_a_at	DMWD	1762	6.51867	6.49498	6.26105	6.1041
1554430_at	FAM165B	54065	5.60107	5.77102	5.5327	5.73252
1554432_x_at	FAM165B	54065	6.3508	6.38965	6.3661	6.49185
1554433_a_at	ZNF146	7705	7.05017	7.23097	6.82445	6.78857
1554436_a_at	REG4	83998	2.67028	2.69422	2.56597	2.50648
1554438_at	KIAA1217	56243	4.04957	3.78158	3.1343	3.04007
1554440_at	KIAA0513	9764	2.9956	3.10577	2.84895	2.81965
1554441_a_at	WAPAL	23063	6.89958	7.01597	7.2164	7.13305
1554442_at	BEST1	7439	6.42252	6.66228	6.27233	6.3328
1554443_s_at	BEST1	7439	3.83193	3.85608	3.91442	3.94555
1554444_s_at	C2orf18	54978	6.74527	6.71758	6.57573	6.61285
1554445_at	ZNF85	7639	4.49047	4.43678	4.57362	4.42758
1554447_at	NCRNA00183	554203	7.12137	6.8613	7.27143	7.3191
1554448_at	NCRNA00183	554203	3.49308	3.46102	3.49028	3.44453
1554449_at	MIER3	166968	2.87688	3.06012	3.70607	3.73515
1554450_s_at	MIER3	166968	5.52225	5.7657	6.42912	6.52565
1554451_s_at	DNAJC14	85406	6.42703	6.48585	6.5531	6.64558
1554452_a_at	C7orf68	29923	8.11293	8.1023	7.96305	8.26238
1554453_at	HNRPLL	92906	4.48022	4.46227	3.74587	3.51697
1554455_at	LINS1	55180	5.82505	5.7093	5.50723	5.33
1554456_a_at	LINS1	55180	5.7096	5.60328	5.5898	5.68005
1554459_s_at	CFHR3	10878	2.902	2.8755	2.86135	2.88707
1554460_at	ST8SIA4	7903	2.20182	2.1285	1.99642	2.06418
1554462_a_at	DNAJB9	4189	7.71647	7.78783	7.23883	7.09438
1554464_a_at	CRTAP	10491	8.55755	8.62868	8.2848	8.28265
1554465_s_at	NA	NA	5.67202	5.65938	5.6712	5.75207
1554466_a_at	C16orf13	84326	8.23717	8.34	8.31248	8.3858
1554468_s_at	NA	NA	5.48075	5.5914	5.71335	5.9105
1554469_at	ZBTB44	29068	3.4597	3.37095	3.83082	3.94235
1554470_s_at	ZBTB44	29068	5.61585	5.62017	6.12927	6.33595
1554471_a_at	ANKRD13C	81573	6.46053	6.49742	6.92845	6.90705
1554472_a_at	PHF20L1	51105	5.36215	5.54748	5.40817	5.32883
1554473_at	SRGAP1	57522	2.72388	2.6361	2.91062	2.77845
1554474_a_at	MOXD1	26002	3.249	3.2946	3.20445	3.27925
1554475_a_at	C19orf47	126526	4.94463	4.8726	4.53	4.69735
1554476_x_at	ZNF808	388558	3.60495	3.55375	3.5641	3.59947
1554478_a_at	HEATR3	55027	5.0989	5.28517	5.36682	5.23473
1554479_a_at	CARD8	22900	9.1028	9.07595	9.08318	8.86565
1554480_a_at	ARMC10	83787	7.86515	7.95518	7.79655	7.83543
1554481_a_at	EPB41	2035	6.03375	5.90828	5.40395	5.36085
1554482_a_at	SAR1B	51128	7.64375	7.72368	7.991	7.87035
1554483_at	TMEM37	140738	6.1942	6.00887	5.60905	5.51018
1554485_s_at	TMEM37	140738	6.1745	5.97975	4.05317	4.16822
1554486_a_at	C6orf114	85411	4.8873	4.9681	5.04012	4.87955
1554487_a_at	ATF6B	1388	5.32945	5.21723	5.1328	5.1727
1554488_at	CEP70	80321	4.4033	4.21753	4.35728	4.41692
1554489_a_at	CEP70	80321	5.14107	5.3843	5.7897	5.88488
1554491_a_at	SERPINC1	462	2.78852	2.91823	2.90923	2.88358
1554492_at	THADA	63892	2.10153	2.14205	2.41655	2.13132
1554493_s_at	THADA	63892	4.2594	4.43063	4.92185	5.1804
1554494_at	MTHFSD	64779	2.54913	2.57133	2.91848	2.84575
1554495_s_at	MTHFSD	64779	3.3961	3.335	3.27022	3.3095
1554496_at	RAD51L1	5890	3.16505	3.16412	3.18595	3.25343
1554499_s_at	PPA2	27068	4.02703	4.2962	4.36482	4.40512
1554500_a_at	RGS7	6000	2.55925	2.45602	2.79087	3.0312
1554501_at	TSC22D4	81628	6.16488	6.0197	5.3814	5.38585
1554503_a_at	OSCAR	126014	4.208	4.31355	4.6029	4.4053
1554504_at	NAALAD2	10003	2.104	2.04718	1.80737	1.93207
1554506_x_at	NAALAD2	10003	2.1544	2.1728	2.03587	2.08122
1554507_at	NAALAD2	10003	2.00015	1.98045	1.8883	1.96652
1554508_at	PIK3AP1	118788	2.58842	2.5335	2.63827	2.49648
1554509_a_at	FAM188A	80013	6.85858	6.92255	7.00302	6.97785
1554510_s_at	GHITM	27069	9.2732	9.37218	9.34433	9.26233
1554511_at	WWC1	23286	3.49518	3.3793	3.24975	3.40207
1554512_a_at	CCDC123	84902	6.04285	5.87015	6.13927	5.95458
1554513_s_at	CCDC123	84902	5.71787	5.59208	5.89343	5.76445
1554514_at	ACSM5	54988	3.25775	3.07637	2.9888	3.03615
1554516_at	NA	NA	5.4926	5.46342	5.33255	5.34277
1554517_x_at	NA	NA	5.71053	5.6511	5.6015	5.78167
1554518_at	GSTCD	79807	4.60038	4.48703	4.78192	4.69005
1554519_at	CD80	941	3.02117	3.0219	3.0609	3.02475
1554520_at	LOC283861	283861	5.30058	5.242	4.97832	5.0751
1554522_at	CNNM2	54805	4.2805	4.30242	5.69977	5.80127
1554523_a_at	CNNM2	54805	5.8706	5.88905	6.02935	6.0309
1554524_a_at	OLFM3	118427	2.4483	2.47492	2.5016	2.67473
1554526_at	OLFM3	118427	1.98218	2.12988	2.10107	2.22978
1554528_at	C3orf15	89876	3.0419	3.07557	3.00385	2.89342
1554530_at	VSTM2A	222008	2.43625	2.3787	2.56628	2.38548
1554531_at	TTC12	54970	5.3868	5.40963	5.34532	5.38012
1554533_at	C2	717	2.00742	2.1214	2.09	2.02763
1554534_at	DPYD	1806	4.1606	4.21965	4.91657	4.92472
1554536_at	DPYD	1806	2.75325	2.5622	3.76738	3.8238
1554537_at	TMEM126B	55863	4.50365	4.32357	4.71935	4.65845
1554538_at	RHOF	54509	4.32238	4.56747	4.71735	4.72847
1554539_a_at	RHOF	54509	5.5831	5.46307	5.7586	5.65267
1554540_at	DNAH14	127602	2.07902	2.11823	2.10137	2.0947
1554541_a_at	GPRIN2	9721	3.96925	3.86183	3.93255	3.92623
1554542_at	LOC153328	153328	4.7322	4.80973	4.6284	4.6446
1554543_at	SPAG9	9043	3.44953	3.54378	3.97267	3.9046
1554544_a_at	MBP	4155	5.59607	5.94028	7.9462	8.02763
1554545_at	APOBEC4	403314	2.8828	2.882	2.9139	2.9476
1554547_at	FAM13C	220965	2.03	2.03058	2.081	2.20693
1554549_a_at	WDR20	91833	4.09282	4.06845	3.911	4.00762
1554550_at	KIAA1430	57587	2.031	2.03635	1.9669	1.99525
1554553_s_at	YIF1B	90522	6.76883	6.58812	6.79958	6.64342
1554554_at	CCDC57	284001	4.2187	4.4356	4.28768	4.33033
1554555_a_at	SETD6	79918	7.09323	6.96132	7.19525	7.2349
1554556_a_at	ATP11B	23200	5.7939	5.79343	5.54552	5.56358
1554557_at	ATP11B	23200	5.84267	5.7994	6.1763	6.17875
1554558_at	DCAF5	8816	2.54845	2.4508	2.8686	2.92705
1554559_at	GPR62	118442	5.03373	5.02065	4.90917	5.03373
1554560_at	PGM5	5239	2.359	2.37938	2.5346	2.42653
1554564_a_at	UNQ1887	121665	3.27293	3.2469	3.1862	3.26845
1554565_x_at	UNQ1887	121665	5.3475	5.2094	5.21545	5.17802
1554566_at	KCTD17	79734	5.10098	4.9499	4.69003	4.8598
1554568_at	DYNLRB1	83658	2.82357	2.89935	2.8615	2.85645
1554569_a_at	CELF2	10659	3.55398	3.4312	3.184	3.2157
1554571_at	APBB1IP	54518	2.56775	2.72978	2.82622	2.64023
1554572_a_at	SUV39H2	79723	7.05187	7.11817	8.52505	8.5521
1554574_a_at	CYB5R3	1727	7.1462	7.04327	6.95723	6.84067
1554575_a_at	BPNT1	10380	5.82415	5.89275	6.25483	6.18865
1554576_a_at	ETV4	2118	5.5362	5.53268	5.56193	5.53008
1554577_a_at	PSMD10	5716	9.98935	10.0649	9.66943	9.58683
1554578_at	ZNF70	7621	5.7708	5.83765	5.82292	5.84272
1554579_a_at	MYO18B	84700	3.65557	3.59992	3.61385	3.6812
1554580_a_at	WWP2	11060	4.86375	4.85292	5.01483	5.05072
1554582_a_at	C12orf72	254013	3.92582	3.66445	4.11502	3.94672
1554583_a_at	C12orf72	254013	3.9508	3.86925	4.00285	3.97033
1554584_at	LRRC48	83450	4.05813	4.20017	3.81683	3.982
1554586_a_at	RHOBTB2	23221	6.07985	5.91543	6.65945	6.7199
1554588_a_at	TTC30B	150737	4.86698	4.58965	5.08887	4.8522
1554589_at	LENG9	94059	4.2602	4.1645	3.97605	3.95198
1554591_at	GDEP	118425	4.02398	3.96745	4.0151	3.98693
1554592_a_at	SLC1A6	6511	2.5654	2.57845	2.3714	2.40603
1554593_s_at	SLC1A6	6511	2.30167	2.3223	2.33568	2.20435
1554594_at	SH3D20	201175	3.11688	3.23225	3.24487	3.11327
1554595_at	SYMPK	8189	7.15742	7.15575	6.92545	6.94903
1554597_at	NA	NA	6.5781	6.68725	6.81492	6.91247
1554599_x_at	NA	NA	6.61115	6.66635	6.85652	6.94163
1554600_s_at	LMNA	4000	9.6636	9.54847	9.8248	9.56353
1554601_at	NKAIN2	154215	2.7117	2.6975	2.6931	2.63285
1554602_at	RBM8A	9939	6.10595	6.07713	6.1415	6.10083
1554604_at	MBTPS2	51360	2.53817	2.65302	2.57288	2.76898
1554606_at	CEP120	153241	3.7876	3.82287	4.85703	4.53665
1554607_at	CNKSR2	22866	2.74593	2.83798	2.75547	2.75545
1554608_at	TGOLN2	10618	4.59832	4.51267	4.25335	4.3388
1554609_at	LOC100287896	100287896	4.70993	4.66528	4.76103	4.8137
1554610_at	ANKMY1	51281	3.89922	3.96507	3.6106	3.8008
1554612_at	KIAA0226	9711	3.10862	2.80748	2.97833	2.7882
1554613_a_at	KIAA0226	9711	4.96617	5.07397	4.84975	5.0469
1554614_a_at	PTBP2	58155	3.59265	4.00732	4.32988	4.37797
1554615_at	NA	NA	3.22795	3.4109	3.4779	3.44977
1554616_at	SERPINB8	5271	5.23053	5.27195	5.15723	5.05063
1554618_at	AGFG2	3268	4.10642	4.25455	4.0612	4.08655
1554619_at	MBLAC2	153364	2.63912	2.6374	2.73042	2.56652
1554621_at	DGKE	8526	4.42488	4.38085	4.65418	4.38978
1554623_x_at	DGKE	8526	4.26518	4.18915	4.24895	4.38135
1554624_a_at	SIRPB1	10326	2.60383	2.61415	2.6406	2.6405
1554625_at	BCL6B	255877	6.0821	6.09548	5.58445	5.44972
1554627_a_at	ASCC1	51008	7.3174	7.43233	7.75458	7.8349
1554628_at	ZNF57	126295	6.13955	6.0433	6.70843	6.7522
1554629_at	EPHA7	2045	2.25612	2.35497	2.25917	2.14005
1554631_at	ATM	472	4.53205	4.78748	4.59178	4.74752
1554633_a_at	MYT1L	23040	3.02893	3.18297	2.78112	2.8585
1554634_at	PDS5B	23047	2.13065	2.0033	1.98723	2.03773
1554635_a_at	NPAS3	64067	4.58955	4.5248	4.3289	4.2963
1554636_at	NA	NA	3.00727	2.8459	2.24305	2.12445
1554637_a_at	CBFA2T2	9139	4.85352	4.96868	4.87003	4.693
1554638_at	ZFYVE16	9765	4.80558	4.5392	5.29665	5.27177
1554640_at	PALM2	114299	2.5288	2.53335	2.72735	2.54695
1554641_a_at	TET3	200424	4.53867	4.4596	4.4587	4.41878
1554642_at	RNF32	140545	4.1032	3.93875	4.08173	4.10273
1554643_at	RGS11	8786	3.2619	3.27365	3.03	3.12032
1554646_at	OSBPL1A	114876	4.33132	4.4533	4.1852	4.20395
1554648_a_at	DUOXA1	90527	2.97313	2.95133	2.88198	2.95263
1554649_at	LOC100288447	100288447	4.20115	4.11988	4.21025	4.053
1554650_a_at	LOC100288447	100288447	4.57808	4.55735	4.42753	4.5151
1554652_s_at	MAST4	375449	4.46683	4.5249	4.3867	4.5049
1554655_a_at	RPRML	388394	4.25788	4.3746	4.38852	4.35238
1554657_a_at	C20orf26	26074	4.4963	4.31273	4.0464	4.0303
1554659_at	NEK4	6787	4.8851	4.90188	4.85008	4.98958
1554660_a_at	CNST	163882	4.40348	4.71242	4.85652	4.57942
1554661_s_at	CNST	163882	5.494	5.59802	5.54038	5.44158
1554662_at	C17orf47	284083	3.41823	3.36117	3.31818	3.3791
1554663_a_at	NUMA1	4926	2.57022	2.70493	2.8193	2.75773
1554664_at	NAIF1	203245	4.12617	4.0061	3.95655	4.0651
1554665_at	ZNF586	54807	2.6918	2.74115	2.5733	2.68815
1554666_at	LOC100130950	100130950	4.0044	4.02767	3.73685	3.95188
1554667_s_at	METTL8	79828	7.43422	7.26845	7.17738	7.15755
1554668_a_at	FAM151A	338094	3.57167	3.65578	3.43393	3.5605
1554670_at	GGA1	26088	6.27732	6.0179	5.7157	5.6345
1554671_a_at	SRRM2	23524	5.50357	5.1302	5.182	5.32145
1554672_at	TTC26	79989	3.02747	3.1557	3.0444	3.2689
1554675_a_at	SYCE1	93426	3.37753	3.3865	3.3016	3.38985
1554676_at	SRGN	5552	4.67188	4.51495	5.53848	5.59585
1554677_s_at	CMTM4	146223	4.3929	4.2557	4.38167	4.4137
1554678_s_at	HNRPDL	9987	9.51767	9.58933	9.9579	9.92442
1554679_a_at	LAPTM4B	55353	7.78257	7.89385	6.19425	6.32132
1554680_s_at	KCNS2	3788	4.28632	4.2908	4.01443	4.10005
1554681_a_at	MGC50722	399693	4.6446	4.6109	4.52168	4.33303
1554683_a_at	MGC50722	399693	5.06307	5.21015	4.9467	5.01925
1554685_a_at	KIAA1199	57214	3.90448	4.08145	3.96588	4.02435
1554686_at	STAU2	27067	2.3245	2.4591	3.14712	2.99003
1554689_a_at	NLGN4X	57502	3.04243	3.01567	3.00628	3.12732
1554690_a_at	TACC1	6867	9.57888	9.4392	8.79002	8.97593
1554691_a_at	PACSIN2	11252	6.41385	6.48885	6.70277	6.8322
1554692_at	SLC23A2	9962	2.59923	2.58347	2.40928	2.55707
1554694_at	CCNY	219771	3.68875	3.77525	3.51785	3.60073
1554696_s_at	TYMS	7298	8.63268	8.67025	10.0067	10.1048
1554697_at	ADAMTS9	56999	4.16327	4.14775	3.55475	3.6149
1554699_at	L3MBTL4	91133	3.02707	2.86837	3.01405	3.09885
1554700_at	CDH7	1005	1.9669	1.92453	2.02925	1.90968
1554701_a_at	TBC1D16	125058	6.0325	6.16265	5.2027	5.49017
1554702_at	NALCN	259232	3.16045	3.23597	3.15627	3.2165
1554703_at	ARHGEF10	9639	7.0002	6.8801	6.70782	6.8088
1554704_at	ATP8B3	148229	5.77575	5.6439	5.66377	5.79933
1554705_at	SCARA5	286133	4.06937	4.04175	4.06988	4.01032
1554706_at	OR2L13	284521	2.13232	2.17003	2.17322	2.2641
1554707_at	C9orf68	55064	2.6001	2.76532	2.52197	2.48185
1554708_s_at	C9orf68	55064	3.7406	3.5595	3.61092	3.76162
1554710_at	KCNMB1	3779	2.78762	2.84422	2.73735	2.70728
1554711_at	CALHM3	119395	4.0502	4.09887	4.04577	4.11625
1554712_a_at	GLYATL2	219970	2.34253	2.5562	2.42462	2.3976
1554714_at	RELL1	768211	2.87187	2.9679	2.8482	3.01435
1554715_at	C15orf50	414926	3.69478	3.61332	3.53248	3.50957
1554716_s_at	C15orf50	414926	2.72233	2.8543	2.6303	2.75323
1554717_a_at	PDE4D	5144	5.36773	5.12547	3.85277	3.9764
1554719_at	NDUFA10	4705	3.87345	3.83257	3.8142	3.54832
1554721_a_at	TAF2	6873	7.46862	7.48155	7.77325	7.74907
1554722_at	TRPM3	80036	2.53	2.48033	2.49517	2.5285
1554723_x_at	NA	NA	2.05038	2.16697	2.16705	2.08053
1554724_at	SLC6A11	6538	2.16643	2.19367	2.185	2.3267
1554725_at	RABGAP1L	9910	2.53833	2.48095	2.5415	2.493
1554726_at	ZNF655	79027	3.69902	3.37373	5.55765	5.44505
1554728_at	SLC9A1	6548	4.053	4.0846	3.884	3.83035
1554730_at	MCTP1	79772	7.73592	7.621	7.09413	7.10875
1554732_at	MGC24125	439935	4.01882	4.1773	4.04127	4.01253
1554733_at	MGC24125	439935	2.1938	2.16807	2.18698	2.08177
1554735_a_at	TRIM7	81786	5.03768	4.90917	4.93645	5.07083
1554736_at	ARHGAP29	9411	3.0091	2.9924	3.06977	3.0207
1554737_at	FBN2	2201	2.99352	2.82495	3.21188	3.2146
1554739_at	IPP	3652	2.41645	2.39502	2.70017	2.50205
1554740_a_at	IPP	3652	5.33455	5.411	5.49425	5.60243
1554741_s_at	NA	NA	2.71647	2.78037	3.0443	2.98223
1554742_at	PMS1	5378	2.86138	2.9528	3.8583	3.52402
1554743_x_at	PMS1	5378	3.83235	3.7706	5.02505	5.0346
1554744_at	CARD16	114769	2.0972	2.07555	2.09013	1.9945
1554745_at	RALGPS1	9649	3.0139	3.06185	3.00533	2.98175
1554747_a_at	2002-09-01	4735	7.99855	8.11108	7.2978	7.26995
1554748_at	CLCNKB	1188	4.5273	4.7396	4.29255	4.54815
1554749_s_at	CLCNKB	1188	5.99525	5.9046	5.59425	5.41102
1554751_at	NA	NA	2.19975	2.23617	2.17822	2.16667
1554752_a_at	NA	NA	4.75975	4.70898	4.40363	4.4428
1554755_a_at	MTUS2	23281	3.44567	3.38925	3.42455	3.48603
1554757_a_at	INPP5A	3632	4.0502	4.16425	3.75312	3.78978
1554758_a_at	CD99L2	83692	4.14787	4.16745	3.88807	4.02913
1554759_at	SRCIN1	80725	4.59085	4.5829	4.65757	4.7612
1554761_a_at	HEATR2	54919	5.92742	5.80385	5.83307	5.88648
1554762_a_at	WWC2	80014	7.27367	7.26975	7.1008	7.17492
1554763_at	UBE2DNL	100131816	3.26045	3.364	3.09712	3.1089
1554764_a_at	C11orf64	283197	1.97338	2.09293	2.037	2.12715
1554765_a_at	C11orf64	283197	2.90572	2.85537	2.81412	2.90293
1554766_s_at	NA	NA	3.30065	3.39423	3.2251	3.22728
1554767_s_at	CRYZL1	9946	6.81745	6.90873	6.5318	6.47553
1554768_a_at	MAD2L1	4085	7.7473	7.84547	9.46562	9.60978
1554769_at	ZNF785	146540	5.30387	5.0472	4.40955	4.4458
1554770_x_at	ZNF785	146540	4.876	4.8222	4.21375	4.17955
1554771_at	NA	NA	3.90645	3.93245	4.24187	4.33727
1554772_at	C17orf57	124989	2.9282	2.79777	2.8706	2.7083
1554773_at	WFIKKN2	124857	4.16045	4.19155	4.28175	4.2121
1554774_at	MINA	84864	4.84912	4.8964	4.99335	4.81712
1554776_at	ZFP42	132625	2.67875	2.73838	2.55778	2.59112
1554777_at	ZFP42	132625	2.4642	2.54343	2.39637	2.42828
1554778_at	PHLDB2	90102	2.3856	2.2242	2.3963	2.3653
1554779_s_at	PHLDB2	90102	3.1936	3.23725	3.31207	3.2681
1554780_a_at	PHTF2	57157	5.46282	5.47542	5.48378	5.50555
1554781_at	NA	NA	2.36137	2.44693	2.35827	2.3956
1554782_at	C2orf19	394261	5.23133	5.36195	5.18212	5.2256
1554783_s_at	ARHGEF2	9181	4.39587	4.23632	4.2141	4.13382
1554784_at	CNTN1	1272	2.47587	2.37162	2.15955	2.09425
1554785_at	CCDC82	79780	3.21515	3.33312	4.03618	3.91115
1554786_at	CASS4	57091	2.1617	2.1468	2.14205	2.28178
1554787_at	C9orf96	169436	3.61078	3.60025	3.5139	3.5638
1554789_a_at	PDE8B	8622	2.35245	2.41162	2.296	2.50752
1554790_at	ZSCAN20	7579	4.61088	4.70888	4.65318	4.45557
1554791_a_at	C2orf67	151050	3.9644	4.01882	3.9728	3.93737
1554793_at	UBE3C	9690	2.23155	2.24172	2.25022	2.21148
1554794_a_at	UBE3C	9690	5.15397	5.2828	5.0639	5.09333
1554795_a_at	FBLIM1	54751	9.19102	9.10298	8.14122	8.36613
1554796_at	DPP6	1804	3.74485	3.88417	3.59203	3.74018
1554797_at	SYT16	83851	2.54435	2.51117	2.41127	2.30397
1554798_at	SNED1	25992	4.46962	4.33352	4.10725	4.16918
1554800_at	RAB39	54734	3.2609	3.2853	3.2415	3.33545
1554801_at	C5orf40	408263	2.64727	2.65658	2.56925	2.57665
1554803_s_at	TRIM72	493829	3.87692	3.8057	3.77935	3.7929
1554804_a_at	CLDN19	149461	6.36552	6.39982	6.10752	6.16167
1554805_at	CLDN19	149461	4.12418	4.05703	4.02468	4.058
1554806_a_at	FBXO8	26269	7.05288	6.91228	7.04482	7.019
1554807_a_at	SPIRE1	56907	7.35838	7.3921	7.31212	7.10925
1554808_at	ACP1	52	4.21772	4.11943	4.19383	4.25973
1554809_at	LOC389199	389199	4.74855	4.74045	4.39372	4.5428
1554810_at	PLA2G4C	8605	4.75237	4.35393	4.16545	3.60237
1554812_at	CLDN20	49861	2.99327	2.9841	2.87708	2.88883
1554813_at	NA	NA	2.8444	2.8309	2.73672	2.9005
1554814_at	UBE2O	63893	6.05615	5.99365	5.9497	5.97362
1554816_at	ASTN2	23245	2.48515	2.60325	2.32262	2.44708
1554818_s_at	C20orf12	55184	2.9036	2.87873	2.9443	2.88922
1554819_a_at	ITGA11	22801	5.11475	5.2351	5.0407	5.021
1554820_at	AGBL3	340351	2.24063	2.24253	2.22985	2.35955
1554821_a_at	ZBED1	9189	7.4148	7.3248	6.54525	6.41653
1554822_at	PHTF2	57157	3.79282	3.74228	4.38172	4.34617
1554824_at	ZNF585A	199704	2.7012	2.61117	2.73297	2.78338
1554825_at	NA	NA	3.25442	3.1772	3.60285	3.36902
1554826_at	CDK15	65061	3.71575	3.8557	3.67468	3.59702
1554827_a_at	ADCY7	113	5.6331	5.63462	5.26295	5.25385
1554828_at	PDGFRA	5156	3.08335	3.31005	2.8249	2.98727
1554830_a_at	STEAP3	55240	3.32257	3.20302	2.9548	2.90285
1554831_x_at	ALS2CR11	151254	2.2386	2.20763	2.2566	2.29385
1554833_at	MCTP2	55784	2.65102	2.7338	2.5548	2.67755
1554834_a_at	RASSF5	83593	3.30538	3.27652	3.07527	3.23115
1554835_a_at	B3GNT5	84002	4.28187	4.2566	4.40848	4.42765
1554836_at	USP36	57602	3.54965	3.5862	3.5901	3.63833
1554837_a_at	NA	NA	5.11208	5.08232	4.97173	4.9537
1554839_at	CIDEC	63924	4.2005	4.1872	4.20903	4.2812
1554840_at	LOC280665	280665	2.7953	2.86605	2.8047	2.72765
1554841_at	MTHFD2L	441024	4.35428	4.6214	4.22568	4.07035
1554842_at	SLC12A1	6557	3.6489	3.5702	3.5081	3.61925
1554844_at	EYA3	2140	2.72017	2.80872	2.75655	2.68163
1554846_at	CCDC158	339965	2.55785	2.53953	2.38177	2.45452
1554847_at	ATP6V1B1	525	4.05583	4.06158	3.90878	4.01575
1554849_at	TOR1A	1861	3.9519	3.8728	3.7102	3.7418
1554850_at	VWA5B2	90113	3.61443	3.57998	3.6931	3.6871
1554852_a_at	KIAA1257	57501	4.73752	4.60455	4.46812	4.55135
1554853_at	CYP2U1	113612	3.04395	3.04188	2.89318	2.95823
1554855_at	PARK2	5071	2.29197	2.31318	2.28512	2.3251
1554857_at	ELMO2	63916	4.05265	4.31612	3.99335	3.97273
1554860_at	PTPN7	5778	4.02398	3.89095	3.83705	3.82117
1554862_at	CMAH	8418	2.41382	2.47812	2.51182	2.48533
1554863_s_at	DOK5	55816	6.374	6.36445	4.81717	4.7415
1554864_a_at	SDC3	9672	4.35735	4.33202	4.18788	4.18515
1554865_at	NA	NA	2.37375	2.39765	2.38813	2.46125
1554866_at	TMEM135	65084	2.20233	2.12293	2.16533	2.16045
1554867_a_at	PRR16	51334	4.5434	4.46213	6.08232	6.05128
1554868_s_at	PCNP	57092	9.17045	9.2379	9.5696	9.59078
1554869_at	WDR37	22884	4.28635	4.34952	4.24645	4.4116
1554871_at	NA	NA	2.27858	2.25155	2.1666	2.28517
1554872_a_at	HMGCLL1	54511	2.84077	2.89175	2.97668	2.91387
1554873_at	CSPP1	79848	4.6755	4.53673	4.96558	4.90987
1554874_at	MITF	4286	2.11433	2.23738	2.33125	2.31793
1554875_at	C2orf34	79823	2.62862	2.53287	2.87223	2.77538
1554876_a_at	S100Z	170591	2.8471	2.96218	2.86833	2.90183
1554878_a_at	ABCD3	5825	4.63945	4.61397	6.9257	6.81738
1554880_at	DKFZP434K028	26070	4.81482	4.98385	4.8445	4.9187
1554882_at	ERCC8	1161	2.87462	2.92415	2.77835	2.78773
1554883_a_at	ERCC8	1161	5.54587	5.63765	5.52998	5.62242
1554884_at	PRIM2	5558	2.04563	2.0163	2.23013	2.29747
1554885_a_at	PRIM2	5558	4.2849	4.0917	6.13953	6.0796
1554886_a_at	MLXIP	22877	3.35162	3.2007	3.1265	3.25195
1554887_at	NA	NA	2.9741	3.09685	2.89907	2.94913
1554889_at	TIA1	7072	3.42382	3.2099	2.99103	2.85175
1554890_a_at	TIA1	7072	6.8558	6.91113	6.7356	6.70065
1554891_at	NA	NA	3.14058	3.30095	3.24992	3.17243
1554892_a_at	MS4A3	932	2.65745	2.63758	2.8744	2.80667
1554894_a_at	PCBD2	84105	6.46675	6.44755	6.48588	6.50767
1554895_a_at	RHBDL2	54933	5.18865	5.29735	5.46235	5.2898
1554897_s_at	RHBDL2	54933	3.9956	3.79157	5.20795	4.90033
1554899_s_at	FCER1G	2207	2.42672	2.32173	2.27883	2.28388
1554901_at	GAFA1	100131227	2.42912	2.57337	2.35425	2.38725
1554903_at	FRMD8	83786	6.34337	6.16715	6.56965	6.54363
1554905_x_at	FRMD8	83786	6.1896	6.18657	6.3909	6.31863
1554906_a_at	MPHOSPH6	10200	4.41827	4.33953	4.19723	4.28615
1554907_a_at	NA	NA	3.92802	3.9126	3.88397	3.7683
1554908_at	HYDIN	54768	2.48728	2.5887	2.5699	2.61528
1554909_at	CCDC36	339834	3.9705	4.12012	4.16568	4.2775
1554910_at	PRKD3	23683	2.7836	2.79205	2.84273	2.81122
1554911_at	ABCC11	85320	4.15245	4.20327	4.1044	3.95895
1554912_at	ESYT3	83850	2.25012	2.17272	2.2689	2.163
1554914_at	PLA2G4D	283748	4.22253	4.04888	3.91425	4.1189
1554915_a_at	PDE12	201626	6.39275	6.28875	6.75343	6.76555
1554916_a_at	JRK	8629	4.11282	4.19663	4.30213	4.35683
1554918_a_at	ABCC4	10257	6.3228	6.4218	6.30785	6.0439
1554919_s_at	C7orf63	79846	3.98897	3.92755	3.8223	3.8138
1554920_at	SCEL	8796	1.9289	1.8631	1.93237	1.88917
1554921_a_at	SCEL	8796	2.25373	2.1612	2.3145	2.27243
1554922_at	ZNF678	339500	2.27223	2.19677	2.53592	2.50128
1554923_at	ANKS6	203286	3.17605	3.1717	3.19928	3.287
1554927_at	LOC646982	646982	3.34887	3.42185	3.26377	3.29302
1554929_at	SIK3	23387	2.68502	2.58862	2.52542	2.62155
1554930_a_at	FUT8	2530	6.80222	6.91487	6.4912	6.43335
1554931_at	CYP4A11	1579	2.34883	2.2427	2.20823	2.34185
1554932_at	ZSWIM2	151112	2.26495	2.0727	2.10757	2.22375
1554933_at	PSIP1	11168	3.0022	2.91055	3.1679	3.31127
1554934_at	RCBTB1	55213	2.6033	2.64447	2.64053	2.62472
1554937_x_at	EXOC3L	283849	5.69238	5.62395	5.61333	5.63112
1554938_a_at	ACOT11	26027	3.86207	3.75035	3.80062	3.78437
1554940_a_at	LOC388882	388882	3.80488	3.95235	3.82638	3.76872
1554941_at	KLHL14	57565	2.82372	2.8227	2.67185	2.57642
1554942_a_at	KLHL14	57565	4.8873	4.95895	4.8031	4.65612
1554943_at	VIL1	7429	4.45765	4.56575	4.51238	4.52172
1554945_x_at	VIL1	7429	3.47768	3.4395	3.32362	3.36627
1554946_at	NA	NA	2.70062	2.73497	2.70655	2.69373
1554947_at	ACAT1	38	2.53592	2.62985	2.65948	2.79018
1554948_at	NA	NA	4.87235	4.66085	5.53172	5.62283
1554949_at	LOC554174	554174	4.45228	4.47052	4.69773	4.60478
1554950_at	ACAN	176	3.81895	3.74538	3.8376	3.86935
1554951_at	NA	NA	2.48088	2.49098	2.47755	2.36465
1554952_s_at	NLRP12	91662	5.01465	4.98597	5.4709	5.63068
1554953_a_at	C21orf90	114043	5.25845	5.2003	5.09285	5.22877
1554954_at	C21orf90	114043	3.67975	3.67592	3.68112	3.59595
1554957_at	NA	NA	2.46572	2.46353	2.46042	2.3827
1554958_at	ZNF641	121274	3.64515	3.7272	3.94163	4.1143
1554960_at	C1orf110	339512	4.79162	5.03625	4.05405	4.1698
1554961_at	FGFR4	2264	4.18398	4.15445	3.9468	4.07918
1554962_a_at	FGFR4	2264	5.37062	5.32843	5.37833	5.30735
1554963_at	NA	NA	3.03723	2.9205	2.63395	2.64905
1554964_x_at	NA	NA	3.02888	2.97015	2.59157	2.48185
1554965_at	FILIP1L	11259	2.35153	2.42112	2.28242	2.27295
1554966_a_at	FILIP1L	11259	8.0276	7.8775	7.54648	7.31915
1554967_at	DIP2A	23181	3.46163	3.43127	3.3385	3.20542
1554969_x_at	DIP2A	23181	3.89388	3.8443	3.95293	3.93145
1554970_at	PDILT	204474	3.17035	3.0648	3.0583	3.02962
1554971_at	OK/SW-CL.58	100131766	2.6877	2.6853	2.76853	2.64522
1554972_at	NA	NA	3.8687	3.87332	3.79068	3.93383
1554973_a_at	ZBTB26	57684	3.88453	3.76417	4.16902	3.99075
1554974_at	ACY3	91703	3.3987	3.32825	3.17415	3.16962
1554976_a_at	NCRNA00051	619434	2.36505	2.35957	2.23762	2.36425
1554977_at	C20orf201	198437	5.55302	5.7548	5.55283	5.52197
1554978_at	C8orf68	619343	3.92553	4.09205	3.76867	3.9981
1554980_a_at	ATF3	467	5.15402	5.20607	5.34962	5.3267
1554981_at	C9orf11	54586	2.15923	2.21095	2.28335	2.17683
1554982_a_at	C9orf11	54586	2.08387	2.04103	2.15633	1.9858
1554983_at	C21orf117	378828	3.40902	3.47038	3.4373	3.30012
1554984_a_at	HLA-DOB	3112	4.17972	4.29955	4.25685	4.24645
1554985_at	ZNF396	252884	3.25708	2.9376	2.38617	2.40612
1554986_a_at	SNX19	399979	4.0625	3.807	3.79153	3.85177
1554987_at	GOLGA3	2802	3.94197	4.18598	4.06355	4.02747
1554988_at	SLC9A11	284525	2.2959	2.29852	2.1908	2.29175
1554989_at	KIAA0317	9870	4.64562	4.58365	4.76668	4.78485
1554992_at	RASGRF1	5923	4.06022	4.24405	4.24605	4.07345
1554994_at	RAG1	5896	2.68037	2.758	2.78627	2.68147
1554996_at	NA	NA	2.44125	2.4738	2.35893	2.41962
1554997_a_at	PTGS2	5743	8.57675	8.6507	2.58945	2.7957
1554999_at	RASGEF1B	153020	2.5837	2.70938	2.7155	2.60323
1555000_at	OK/SW-CL.36	100131077	2.79155	2.68135	2.8068	2.71387
1555001_at	IQCF1	132141	2.27648	2.25	2.35323	2.3829
1555002_at	MGC39545	403312	2.11395	2.24943	2.11058	2.32985
1555003_at	RBL1	5933	2.3147	2.23292	2.41685	2.42593
1555004_a_at	RBL1	5933	3.5198	3.60135	5.52428	5.31532
1555006_at	WDR66	144406	4.0711	3.83482	3.50378	3.63045
[truncated: 52,614 more rows]
